# Supplementary material
Source: Elsevier journal article supplement (https://www.sciencedirect.com/science/article/pii/S1885585725002464)
Supplement: mmc1 [file mmc1.pdf]

# SUPPLEMENTARY MATERIAL

**Supplementary Table 1.** Two-sided test of the scaled Schoenfeld residuals over time

**Supplementary Table 2.** Clinical and procedural characteristics of patients with and without qualifying platelet data

**Supplementary Table 3.** Clinical and procedural characteristics of patients stratified into seven groups according to platelet count change and its severity

**Supplementary Table 4.** Multivariate predictors of platelet count changes >30%

**Supplementary Table 5.** Multivariable association of alternative platelet count thresholds (< 150 000/ $\mu$ L and > 400 000/ $\mu$ L) with mortality and bleeding

**Supplementary Table 6.** Causes of mortality across groups of platelet count changes

**Supplementary Figure 1.** Sankey diagram for transition of thrombocytopenia (<100 000/ $\mu$ L), normal platelet count (100 000-450 000/ $\mu$ L), and thrombocytosis (> 450 000/ $\mu$ L) rates from baseline to nadir

**Supplementary Figure 2.** Sankey diagram for transition of thrombocytopenia (< 150 000/ $\mu$ L), normal platelet count (150 000-400 000/ $\mu$ L), and thrombocytosis (> 400 000/ $\mu$ L) rates from baseline to nadir

**Supplementary Figure 3.** Histogram of the distribution of relative changes in platelet count

**Supplementary Figure 4.** Rates of platelet count changes > 30% across randomized treatments

**Supplementary Figure 5.** Spline functions of relative changes in platelet count on a continuous scale and 1-year mortality and bleeding stratified according to platelet count < 100 000/ $\mu$ L at baseline

**Supplementary Figure 6.** Spline functions of relative changes in platelet count on a

continuous scale and 1-year mortality and bleeding stratified according to platelet count  $> 450$  000/ $\mu$ L at baseline

**Supplementary Figure 7.** Spline functions of relative changes in platelet count on a continuous scale and 1-year mortality and bleeding stratified according to platelet count  $< 100$  000/ $\mu$ L at nadir

**Supplementary Figure 8.** Spline functions of relative changes in platelet count on a continuous scale and 1-year mortality and bleeding stratified according to platelet count  $> 450$  000/ $\mu$ L at nadir

**Supplementary Figure 9.** Spline functions of relative changes in platelet count on a continuous scale and 1-year mortality and bleeding stratified according to platelet count  $< 150$  000/ $\mu$ L at baseline

**Supplementary Figure 10.** Spline functions of relative changes in platelet count on a continuous scale and 1-year mortality and bleeding stratified according to platelet count  $> 400$  000/ $\mu$ L at baseline

**Supplementary Figure 11.** Spline functions of relative changes in platelet count on a continuous scale and 1-year mortality and bleeding stratified according to platelet count  $< 150$  000/ $\mu$ L at nadir

**Supplementary Figure 12.** Spline functions of relative changes in platelet count on a continuous scale and 1-year mortality and bleeding stratified according to platelet count  $> 400$  000/ $\mu$ L at nadir

**Supplementary Figure 13.** Spline functions of relative changes in platelet count on a continuous scale and 1-year mortality and bleeding stratified according to randomization to radial access vs femoral access

**Supplementary Figure 14.** Spline functions of relative changes in platelet count on a

continuous scale and 1-year mortality and bleeding stratified according to randomization to bivalirudin vs UFH

**Supplementary Figure 15.** Spline functions of relative changes in platelet count on a continuous scale and 1-year mortality and bleeding stratified according to age  $\geq 75$  years

**Supplementary Figure 16.** Spline functions of relative changes in platelet count on a continuous scale and 1-year mortality and bleeding stratified according to diabetes mellitus

**Supplementary Figure 17.** Spline functions of relative changes in platelet count on a continuous scale and 1-year mortality and bleeding stratified according to renal failure

**Supplementary Figure 18.** Spline functions of relative changes in platelet count on a continuous scale and 1-year mortality and bleeding stratified according to STEMI

**Supplementary Figure 19.** Spline functions of relative changes in platelet count on a continuous scale and 1-year mortality stratified according to any/in-hospital/out-of-hospital bleeding

**Supplementary Figure 20.** Spline functions of relative changes in platelet count on a continuous scale and 1-year cardiovascular and noncardiovascular mortality

**Supplementary Figure 21.** Event rates of patients stratified according to platelet count drop/increase  $> 30\%$  and low ( $< 100\,000/\mu\text{L}$ )/high ( $> 450\,000/\mu\text{L}$ ) platelet count at baseline or nadir

**Supplementary Figure 22.** Spline functions of absolute changes in platelet count and 1-year mortality and bleeding

**Supplementary Figure 23.** Spline functions of relative changes in platelet count and 1-year mortality and bleeding after excluding patients with low ( $< 100\,000/\mu\text{L}$ ) or high ( $> 450\,000/\mu\text{L}$ ) platelet counts at baseline and/or nadir

**Supplementary Figure 24.** Spline functions of absolute changes in platelet count and 1-year mortality and bleeding after excluding patients with low ( $< 100\,000/\mu\text{L}$ ) or high ( $> 450\,000/\mu\text{L}$ ) platelet counts at baseline and/or nadir

**Supplementary Figure 25.** Spline functions of relative changes in platelet count and 1-year mortality and bleeding after excluding patients receiving glycoprotein IIb/IIIa inhibitors

**Supplementary Figure 26.** Spline functions of absolute changes in platelet count and 1-year mortality and bleeding after excluding patients receiving glycoprotein IIb/IIIa inhibitors

**Supplementary Table 1.** Two-sided test of the scaled Schoenfeld residuals over time

| Analysis                                                                                                                                                    | Outcome   | Chi <sup>2</sup> | df | <i>P</i> |
|-------------------------------------------------------------------------------------------------------------------------------------------------------------|-----------|------------------|----|----------|
| RCS (percentage change)                                                                                                                                     | Mortality | 25.09            | 18 | .123     |
|                                                                                                                                                             | Bleeding  | 20.83            | 18 | .288     |
| 3 Groups                                                                                                                                                    | Mortality | 22.86            | 16 | .118     |
|                                                                                                                                                             | Bleeding  | 17.54            | 16 | .352     |
| 7 Groups                                                                                                                                                    | Mortality | 29.08            | 20 | .086     |
|                                                                                                                                                             | Bleeding  | 20.62            | 20 | .420     |
| RCS (absolute change)                                                                                                                                       | Mortality | 24.28            | 18 | .146     |
|                                                                                                                                                             | Bleeding  | 22.23            | 18 | .222     |
| RCS (percentage change) after excluding patients with thrombocytopenia (< 100 000/ $\mu$ L) or thrombocytosis (> 450 000/ $\mu$ L) at baseline and/or nadir | Mortality | 24.26            | 18 | .147     |
|                                                                                                                                                             | Bleeding  | 18.28            | 18 | .375     |
| RCS (absolute change) after excluding patients with thrombocytopenia (< 100 000/ $\mu$ L) or thrombocytosis (> 450 000/ $\mu$ L) at baseline and/or nadir   | Mortality | 23.96            | 18 | .157     |
|                                                                                                                                                             | Bleeding  | 19.44            | 18 | .365     |
| RCS, restricted cubic splines                                                                                                                               |           |                  |    |          |

**Supplementary Table 2.** Baseline clinical characteristics of patients with and without qualifying platelet data

|                                                   | Study population<br>(n = 7722) | Incomplete platelet data<br>(n = 657) |
|---------------------------------------------------|--------------------------------|---------------------------------------|
| <b>Randomization</b>                              |                                |                                       |
| <i>Radial vs femoral</i>                          | 7722                           | 657                                   |
| Radial                                            | 3846 (49.8)                    | 341 (51.9)                            |
| Femoral                                           | 3876 (50.2)                    | 316 (48.1)                            |
| <i>Bivalirudin vs UFH</i>                         | 6687                           | 502                                   |
| Bivalirudin                                       | 3368 (50.4)                    | 231 (46.0)                            |
| UFH                                               | 3319 (49.6)                    | 271 (54.0)                            |
| <b>Clinical Characteristics</b>                   |                                |                                       |
| <i>Age, y</i>                                     | 65.7 ± 11.8                    | 65.8 ± 12.2                           |
| <i>Male sex</i>                                   | 5703 (73.9)                    | 454 (69.1)                            |
| <i>BMI, kg/m<sup>2</sup></i>                      | 27.1 ± 4.1                     | 27.2 ± 4.4                            |
| <i>Diabetes mellitus</i>                          | 1755 (22.7)                    | 142 (21.6)                            |
| Insulin dependent                                 | 427 (5.5)                      | 36 (5.5)                              |
| <i>Current smoking</i>                            | 2677 (34.7)                    | 206 (31.4)                            |
| <i>Hypercholesterolemia</i>                       | 3406 (44.1)                    | 280 (42.6)                            |
| <i>Hypertension</i>                               | 4905 (63.5)                    | 388 (59.1)                            |
| <i>Family history of CAD</i>                      | 2102 (27.2)                    | 187 (28.5)                            |
| <i>Previous MI</i>                                | 1108 (14.3)                    | 93 (14.2)                             |
| <i>Previous PCI</i>                               | 1100 (14.2)                    | 94 (14.3)                             |
| <i>Previous CABG</i>                              | 246 (3.2)                      | 11 (1.7)                              |
| <i>Previous stroke or TIA</i>                     | 381 (4.9)                      | 42 (6.4)                              |
| <i>Peripheral vascular disease</i>                | 662 (8.6)                      | 46 (7.0)                              |
| <i>COPD</i>                                       | 493 (6.4)                      | 37 (5.6)                              |
| <i>Renal failure</i>                              | 99 (1.3)                       | 4 (0.6)                               |
| <i>Dialysis</i>                                   | 8 (0.1)                        | 0 (0.0)                               |
| <i>Killip class</i>                               |                                |                                       |
| I                                                 | 6994 (90.6)                    | 590 (89.8)                            |
| II                                                | 516 (6.7)                      | 45 (6.8)                              |
| III                                               | 153 (2.0)                      | 11 (1.7)                              |
| IV                                                | 59 (0.8)                       | 11 (1.7)                              |
| <i>Clinical presentation</i>                      |                                |                                       |
| Unstable angina                                   | 448 (5.8)                      | 60 (9.1)                              |
| NSTEMI                                            | 3567 (46.2)                    | 314 (47.8)                            |
| STEMI                                             | 3707 (48.0)                    | 283 (43.1)                            |
| <i>LVEF, %</i>                                    | 51.1 ± 9.6                     | 51.6 ± 9.4                            |
| <i>Hemoglobin, g/dl</i>                           | 14.0 ± 1.8                     | 13.7 ± 2.0                            |
| <i>Platelet count, per 10<sup>3</sup>/μL</i>      | 229 ± 67                       | N=404, 223 ± 77                       |
| Thrombocytopenia<br>(platelet count < 150 000/μL) | 610 (7.9)                      | N=404, 43 (10.6)                      |
| Thrombocytosis                                    | 134 (1.7)                      | N=404, 9 (2.2)                        |

|                                                                    |                 |                 |
|--------------------------------------------------------------------|-----------------|-----------------|
| (platelet count > 400 000/ $\mu$ L)                                |                 |                 |
| <i>WBC count, per 10<sup>3</sup>/<math>\mu</math>L</i>             | 9.8 $\pm$ 3.5   | 9.6 $\pm$ 3.5   |
| <i>eGFR, ml/min/1.73 m<sup>2</sup></i>                             | 83.7 $\pm$ 25.5 | 85.5 $\pm$ 24.5 |
| <b>Medications at discharge</b>                                    |                 |                 |
| <i>Aspirin</i>                                                     | 7320 (95.5)     | 577 (93.2)      |
| <i>Clopidogrel</i>                                                 | 2818 (36.8)     | 193 (31.2)      |
| <i>Prasugrel</i>                                                   | 1475 (19.2)     | 73 (11.8)       |
| <i>Ticagrelor</i>                                                  | 2261 (29.5)     | 237 (38.3)      |
| <i>ACE inhibitors</i>                                              | 5286 (69.0)     | 398 (64.3)      |
| <i>Angiotensin II receptor blockers</i>                            | 913 (11.9)      | 76 (12.3)       |
| <i>Statins</i>                                                     | 6994 (91.3)     | 536 (86.6)      |
| <i>Beta-blockers</i>                                               | 6253 (81.6)     | 493 (79.6)      |
| <i>Warfarin</i>                                                    | 273 (3.6)       | 16 (2.6)        |
| <i>Proton pump inhibitors</i>                                      | 6747 (88.0)     | 504 (81.4)      |
| <b>Procedure</b>                                                   |                 |                 |
| <i>Coronary angiography completed</i>                              | 7720 (100.0)    | 650 (98.9)      |
| <i>CABG</i>                                                        | 264 (3.4)       | 45 (6.8)        |
| <i>Patient with significant lesion and medical treatment</i>       | 868 (11.2)      | 121 (18.4)      |
| <i>Patient without significant lesion</i>                          | 328 (4.2)       | 37 (5.6)        |
| <i>PCI attempted</i>                                               | 6261 (81.1)     | 447 (68.6)      |
| <i>Patient died during PCI</i>                                     | 0 (0.0)         | 2 (0.3)         |
| <i>PCI completed</i>                                               | 6261 (81.1)     | 445 (67.7)      |
| <i>IABP</i>                                                        | 172 (2.2)       | 13 (2.0)        |
| <i>Total amount of injected contrast, mL</i>                       | 166 $\pm$ 84    | 156 $\pm$ 98    |
| <i>Duration of procedure, min</i>                                  | 50 $\pm$ 28     | 50 $\pm$ 28     |
| <b>Medications in the catheterization laboratory</b>               |                 |                 |
| <i>Clopidogrel</i>                                                 | 489 (6.3)       | 31 (4.7)        |
| <i>Prasugrel</i>                                                   | 604 (7.8)       | 19 (2.9)        |
| <i>Ticagrelor</i>                                                  | 688 (8.9)       | 85 (12.9)       |
| <i>Glycoprotein IIb/IIIa inhibitor</i>                             | 1036 (13.4)     | 55 (8.4)        |
| <i>Adenosine</i>                                                   | 241 (3.1)       | 19 (2.9)        |
| <i>Nitroprussiate</i>                                              | 137 (1.8)       | 6 (0.9)         |
| <b>PCIs</b>                                                        | 6261            | 445             |
| <i>TIMI 3 flow post-procedure in all treated lesions</i>           | 6010 (96.0)     | 418 (93.9)      |
| <i>Coronary stenosis after PCI &lt; 30% in all treated lesions</i> | 6042 (96.5)     | 419 (94.2)      |
| <i>Procedural success in all treated lesions</i>                   | 5879 (93.9)     | 404 (90.8)      |
| <i>Partial procedural success*</i>                                 | 113 (1.8)       | 11 (2.5)        |
| <i>Procedural failure</i>                                          | 139 (2.2)       | 18 (4.0)        |
| <i>Treated vessel(s)</i>                                           |                 |                 |
| <i>Left main coronary artery</i>                                   | 247 (3.9)       | 22 (4.9)        |
|                                                                    | 3087 (49.3)     | 212 (47.6)      |

|                                             |             |             |
|---------------------------------------------|-------------|-------------|
| <i>Left circumflex artery</i>               | 1660 (26.5) | 138 (31.0)  |
| <i>Right coronary artery</i>                | 2076 (33.2) | 135 (30.3)  |
| <i>Bypass graft</i>                         | 53 (0.8)    | 2 (0.4)     |
| <i>≥ 2 vessels treated</i>                  | 787 (12.6)  | 59 (13.3)   |
| <i>Lesion(s) treated per patient</i>        |             |             |
| 1                                           | 4940 (79.0) | 344 (77.3)  |
| 2                                           | 1075 (17.2) | 85 (19.1)   |
| ≥ 3                                         | 242 (3.9)   | 16 (3.6)    |
| <i>Number of stents per patient</i>         | 1.4 ± 0.9   | 1.4 ± 0.9   |
| <i>Overall stent length per patient, mm</i> | 31.7 ± 19.5 | 30.4 ± 19.4 |

ACE, angiotensin-converting enzyme; BMI, body mass index; CABG, coronary artery bypass grafting; CAD, coronary artery disease; COPD, chronic obstructive pulmonary disease; eGFR, estimated glomerular filtration rate; IABP, intra-aortic balloon pump; LVEF, left ventricular ejection fraction; MI, myocardial infarction; NSTEMI, non-ST-elevation myocardial infarction; PCI, percutaneous coronary intervention; STEMI, ST-elevation myocardial infarction; TIA, transient ischemic attack; TIMI, Thrombolysis in Myocardial Infarction; WBC, white blood cell.

The data are expressed as No. (%) or mean ± standard deviation.

\*TIMI 3 flow and coronary stenosis less than 30% in at least 1 lesion.



**Supplementary Table 3.** Baseline clinical characteristics of patients stratified into seven groups according to platelet count change and its severity

|                                 | Drop > 50%<br>(n = 84) | Drop<br>30%-50%<br>(n = 419) | Drop<br>10%-30%<br>(n = 3168) | Reference<br>(n = 3562) | Increase<br>10%-30%<br>(n = 399) | Increase<br>30%-50%<br>(n = 59) | Increase >50%<br>(n = 31) | <i>P</i> |
|---------------------------------|------------------------|------------------------------|-------------------------------|-------------------------|----------------------------------|---------------------------------|---------------------------|----------|
| <b>Randomization</b>            |                        |                              |                               |                         |                                  |                                 |                           |          |
| <i>Radial vs femoral</i>        | 84                     | 419                          | 3168                          | 3562                    | 399                              | 59                              | 31                        |          |
| Radial                          | 42 (50.0)              | 203 (48.4)                   | 1538 (48.5)                   | 1794 (50.4)             | 218 (54.6)                       | 31 (52.5)                       | 20 (64.5)                 |          |
| Femoral                         | 42 (50.0)              | 216 (51.6)                   | 1630 (51.5)                   | 1768 (49.6)             | 181 (45.4)                       | 28 (47.5)                       | 11 (35.5)                 |          |
| <i>Bivalirudin vs UFH</i>       | 69                     | 367                          | 2838                          | 3015                    | 328                              | 44                              | 26                        |          |
| Bivalirudin                     | 28 (40.6)              | 166 (45.2)                   | 1473 (51.9)                   | 1496 (49.6)             | 170 (51.8)                       | 25 (56.8)                       | 10 (38.5)                 |          |
| UFH                             | 41 (59.4)              | 201 (54.8)                   | 1365 (48.1)                   | 1519 (50.4)             | 158 (48.2)                       | 19 (43.2)                       | 16 (61.5)                 |          |
| <b>Clinical characteristics</b> |                        |                              |                               |                         |                                  |                                 |                           |          |
| <i>Age, yrs</i>                 | 71.0 ± 1.8             | 67.3 ± 11.6                  | 65.5 ± 11.7                   | 65.3 ± 11.9             | 68.0 ± 11.9                      | 69.9 ± 11.5                     | 66.6 ± 9.8                | < .001   |
| <i>Male sex</i>                 | 54 (64.3)              | 287 (68.5)                   | 2,331 (73.6)                  | 2,684 (75.4)            | 286 (71.7)                       | 38 (64.4)                       | 23 (74.2)                 | .006     |
| <i>BMI, kg/m<sup>2</sup></i>    | 26.6 ± 3.5)            | 26.6 ± 4.0                   | 26.9 ± 4.0                    | 27.3 ± 4.2              | 27.2 ± 4.3                       | 26.6 ± 3.3                      | 26.1 ± 4.3                | < .001   |
| <i>Diabetes mellitus</i>        | 21 (25.0)              | 97 (23.2)                    | 662 (2.9)                     | 849 (23.8)              | 102 (25.6)                       | 16 (27.1)                       | 8 (25.8)                  | .075     |
| Insulin dependent               | 7 (8.3)                | 26 (6.2)                     | 158 (5.0)                     | 204 (5.7)               | 23 (5.8)                         | 5 (8.5)                         | 4 (12.9)                  | .243     |
| <i>Current smoking</i>          | 15 (17.9)              | 150 (35.8)                   | 1,123 (35.4)                  | 1,262 (35.4)            | 100 (25.1)                       | 15 (25.4)                       | 12 (38.7)                 | < .001   |
| <i>Hypercholesterolemia</i>     | 26 (31.0)              | 174 (41.5)                   | 1,400 (44.2)                  | 1,607 (45.1)            | 162 (4.6)                        | 24 (4.7)                        | 13 (41.9)                 | .094     |
| <i>Hypertension</i>             | 54 (64.3)              | 265 (63.2)                   | 1,989 (62.8)                  | 2,271 (63.8)            | 269 (67.4)                       | 41 (69.5)                       | 16 (51.6)                 | .392     |
| <i>Family history of CAD</i>    | 18 (21.4)              | 109 (26.0)                   | 849 (26.8)                    | 1,012 (28.4)            | 92 (23.1)                        | 12 (2.3)                        | 10 (32.3)                 | .131     |
| <i>Previous MI</i>              | 12 (14.3)              | 56 (13.4)                    | 443 (14.0)                    | 530 (14.9)              | 60 (15.0)                        | 5 (8.5)                         | 2 (6.5)                   | .560     |
| <i>Previous PCI</i>             | 14 (16.7)              | 48 (11.5)                    | 448 (14.1)                    | 526 (14.8)              | 60 (15.0)                        | 3 (5.1)                         | 1 (3.2)                   | .081     |
| <i>Previous CABG</i>            | 2 (2.4)                | 13 (3.1)                     | 88 (2.8)                      | 121 (3.4)               | 19 (4.8)                         | 2 (3.4)                         | 1 (3.2)                   | .466     |
| <i>Previous stroke or TIA</i>   | 6 (7.1)                | 18 (4.3)                     | 163 (5.1)                     | 168 (4.7)               | 19 (4.8)                         | 5 (8.5)                         | 2 (6.5)                   | .724     |

|                                                |             |             |              |              |             |             |             |        |
|------------------------------------------------|-------------|-------------|--------------|--------------|-------------|-------------|-------------|--------|
| <i>Peripheral vascular disease</i>             | 9 (1.7)     | 41 (9.8)    | 242 (7.6)    | 313 (8.8)    | 44 (11.0)   | 8 (13.6)    | 5 (16.1)    | .057   |
| <i>COPD</i>                                    | 11 (13.1)   | 43 (1.3)    | 168 (5.3)    | 239 (6.7)    | 25 (6.3)    | 3 (5.1)     | 4 (12.9)    | < .001 |
| <i>Renal failure</i>                           | 2 (2.4)     | 8 (1.9)     | 36 (1.1)     | 44 (1.2)     | 8 (2.0)     | 0 (.0)      | 1 (3.2)     | .419   |
| <i>Dialysis</i>                                | 1 (1.2)     | 2 (.5)      | 1 (.0)       | 3 (.1)       | 1 (.3)      | 0 (.0)      | 0 (.0)      | .007   |
| <i>Killip class</i>                            |             |             |              |              |             |             |             | < .001 |
| I                                              | 64 (76.2)   | 350 (83.5)  | 2,905 (91.7) | 3,246 (91.1) | 357 (89.5)  | 49 (83.1)   | 23 (74.2)   |        |
| II                                             | 8 (9.5)     | 43 (1.3)    | 178 (5.6)    | 244 (6.9)    | 27 (6.8)    | 9 (15.3)    | 7 (22.6)    |        |
| III                                            | 5 (6.0)     | 14 (3.3)    | 65 (2.1)     | 56 (1.6)     | 11 (2.8)    | 1 (1.7)     | 1 (3.2)     |        |
| IV                                             | 7 (8.3)     | 12 (2.9)    | 20 (.6)      | 16 (.4)      | 4 (1.0)     | 0 (.0)      | 0 (.0)      |        |
| <i>Clinical presentation</i>                   |             |             |              |              |             |             |             | < .001 |
| Unstable angina                                | 2 (2.4)     | 13 (3.1)    | 165 (5.2)    | 244 (6.9)    | 21 (5.3)    | 2 (3.4)     | 1 (3.2)     |        |
| NSTEMI                                         | 24 (28.6)   | 119 (28.4)  | 1,266 (4.0)  | 1,857 (52.1) | 253 (63.4)  | 35 (59.3)   | 13 (41.9)   |        |
| STEMI                                          | 58 (69.0)   | 287 (68.5)  | 1,737 (54.8) | 1,461 (41.0) | 125 (31.3)  | 22 (37.3)   | 17 (54.8)   |        |
| <i>LVEF, %</i>                                 | 43.9 ± 13.5 | 47.4 ± 11.4 | 5.8 ± 9.5    | 51.8 ± 9.2   | 51.8 ± 9.2  | 49.2 ± 1.5) | 47.6 ± 9.2  | < .001 |
| <i>Hemoglobin, g/dL</i>                        | 13.5 ± 2.38 | 14.1 ± 2.0  | 14.3 ± 1.7   | 13.9 ± 1.7   | 13.4 ± 1.91 | 13.0 ± 2.3  | 13.3 ± 2.3  | < .001 |
| <i>Platelet count, per 10<sup>3</sup>/μL</i>   | 282 ± 88    | 266 ± 85    | 238 ± 65     | 220 ± 63     | 194 ± 56.9  | 187 ± 65    | 164 ± 58.2  | < .001 |
| Thrombocytopenia (platelet count < 150 000/μL) | 3 (3.6)     | 18 (4.3)    | 152 (4.8)    | 314 (8.8)    | 88 (22.1)   | 19 (32.2)   | 16 (51.6)   | < .001 |
| Thrombocytosis (platelet count > 400 000/μL)   | 11 (13.1)   | 24 (5.7)    | 63 (2.0)     | 34 (1.0)     | 2 (.5)      | 0 (.0)      | 0 (.0)      | < .001 |
| <i>WBC count, per 10<sup>3</sup>/μL</i>        | 12.4 ± 6.1  | 11.4 ± 4.4  | 1.0 ± 3.3    | 9.4 ± 3.2    | 9.0 ± 3.3   | 1.2 ± 3.7   | 1.3 ± 3.4   | < .001 |
| <i>eGFR, mL/min/1.73 m<sup>2</sup></i>         | 73.7 ± 29.1 | 77.5 ± 28.2 | 83.0 ± 24.7  | 85.4 ± 25.3  | 83.8 ± 28.5 | 81.1 ± 23.2 | 82.4 ± 28.0 | < .001 |

|                                                              |           |            |              |              |            |           |           |        |
|--------------------------------------------------------------|-----------|------------|--------------|--------------|------------|-----------|-----------|--------|
| <b>Medications at discharge</b>                              |           |            |              |              |            |           |           |        |
| <i>Aspirin</i>                                               | 64 (85.3) | 378 (93.3) | 3,038 (96.2) | 3,390 (95.7) | 369 (93.7) | 52 (89.7) | 29 (96.7) | < .001 |
| <i>Clopidogrel</i>                                           | 30 (4.0)  | 154 (38.0) | 1,175 (37.2) | 1,278 (36.1) | 152 (38.6) | 21 (36.2) | 8 (26.7)  | .745   |
| <i>Prasugrel</i>                                             | 8 (1.7)   | 85 (21.0)  | 719 (22.8)   | 609 (17.2)   | 40 (1.2)   | 7 (12.1)  | 7 (23.3)  | < .001 |
| <i>Ticagrelor</i>                                            | 14 (18.7) | 99 (24.4)  | 866 (27.4)   | 1,121 (31.6) | 138 (35.0) | 14 (24.1) | 9 (3.0)   | < .001 |
| <i>ACE inhibitors</i>                                        | 43 (57.3) | 275 (67.9) | 2,198 (69.6) | 2,460 (69.4) | 249 (63.2) | 38 (65.5) | 23 (76.7) | .040   |
| <i>Angiotensin II receptor blockers</i>                      | 9 (12.0)  | 41 (1.1)   | 343 (1.9)    | 458 (12.9)   | 53 (13.5)  | 7 (12.1)  | 2 (6.7)   | .137   |
| <i>Statins</i>                                               | 60 (8.0)  | 364 (89.9) | 2,928 (92.7) | 3,220 (9.9)  | 347 (88.1) | 48 (82.8) | 27 (9.0)  | < .001 |
| <i>Beta-blockers</i>                                         | 57 (76.0) | 326 (8.5)  | 2,615 (82.8) | 2,868 (8.9)  | 313 (79.4) | 47 (81.0) | 27 (9.0)  | .197   |
| <i>Warfarin</i>                                              | 6 (8.0)   | 20 (4.9)   | 110 (3.5)    | 117 (3.3)    | 18 (4.6)   | 2 (3.4)   | 0 (.0)    | .145   |
| <i>Proton pump inhibitors</i>                                | 71 (94.7) | 358 (88.4) | 2,761 (87.4) | 3,129 (88.3) | 349 (88.6) | 52 (89.7) | 27 (9.0)  | .555   |
| <b>Procedure</b>                                             |           |            |              |              |            |           |           |        |
| <i>Coronary angiography completed</i>                        | 84 (10.0) | 418 (99.8) | 3,167 (10.0) | 3,562 (10.0) | 399 (10.0) | 59 (10.0) | 31 (10.0) | .208   |
| <i>CABG</i>                                                  | 13 (15.5) | 35 (8.4)   | 91 (2.9)     | 106 (3.0)    | 13 (3.3)   | 5 (8.5)   | 1 (3.2)   | < .001 |
| <i>Patient with significant lesion and medical treatment</i> | 5 (6.0)   | 23 (5.5)   | 292 (9.2)    | 471 (13.2)   | 62 (15.5)  | 12 (2.3)  | 3 (9.7)   | < .001 |
| <i>Patient without significant lesion</i>                    | 3 (3.6)   | 15 (3.6)   | 106 (3.3)    | 178 (5.0)    | 20 (5.0)   | 4 (6.8)   | 2 (6.5)   | .033   |
| <i>PCI attempted</i>                                         | 63 (75.0) | 345 (82.3) | 2,679 (84.6) | 2,807 (78.8) | 304 (76.2) | 38 (64.4) | 25 (8.6)  | < .001 |
| <i>Patient died during PCI</i>                               | 0 (.0)    | 0 (.0)     | 0 (.0)       | 0 (.0)       | 0 (.0)     | 0 (.0)    | 0 (.0)    | 1.000  |
| <i>PCI completed</i>                                         | 63 (75.0) | 345 (82.3) | 2,679 (84.6) | 2,807 (78.8) | 304 (76.2) | 38 (64.4) | 25 (8.6)  | < .001 |
| <i>IABP</i>                                                  | 14 (22.2) | 40 (11.6)  | 37 (1.4)     | 36 (1.3)     | 2 (.7)     | 0 (.0)    | 1 (4.0)   | < .001 |
| <i>Total amount of injected contrast, mL</i>                 | 173 ± 111 | 160 ± 77   | 168 ± 82     | 164 ± 86     | 166 ± 86   | 164 ± 87  | 159 ± 84  | .403   |

|                                                                    |           |            |              |              |            |           |           |        |
|--------------------------------------------------------------------|-----------|------------|--------------|--------------|------------|-----------|-----------|--------|
| <i>Duration of procedure, min</i>                                  | 58 ± 33   | 52 ± 30    | 49 ± 27      | 49 ± 29      | 48 ± 29    | 50 ± 30   | 54 ± 31.0 | .028   |
| <b>Medications in the catheterization laboratory</b>               |           |            |              |              |            |           |           |        |
| <i>Clopidogrel</i>                                                 | 9 (1.7)   | 31 (7.4)   | 213 (6.7)    | 203 (5.7)    | 28 (7.0)   | 4 (6.8)   | 1 (3.2)   | .270   |
| <i>Prasugrel</i>                                                   | 8 (9.5)   | 21 (5.0)   | 288 (9.1)    | 259 (7.3)    | 24 (6.0)   | 3 (5.1)   | 1 (3.2)   | .010   |
| <i>Ticagrelor</i>                                                  | 10 (11.9) | 42 (1.0)   | 258 (8.1)    | 323 (9.1)    | 45 (11.3)  | 4 (6.8)   | 6 (19.4)  | .082   |
| <i>Glycoprotein IIb/IIIa inhibitor</i>                             | 21 (25.0) | 83 (19.8)  | 431 (13.6)   | 441 (12.4)   | 51 (12.8)  | 3 (5.1)   | 6 (19.4)  | < .001 |
| <i>Adenosine</i>                                                   | 2 (2.4)   | 18 (4.3)   | 115 (3.6)    | 98 (2.8)     | 5 (1.3)    | 3 (5.1)   | 0 (.0)    | .047   |
| <i>Nitroprussiate</i>                                              | 2 (2.4)   | 13 (3.1)   | 73 (2.3)     | 43 (1.2)     | 6 (1.5)    | 0 (.0)    | 0 (.0)    | .007   |
| <b>PCIs</b>                                                        | 63        | 345        | 2,679        | 2,807        | 304        | 38        | 25        |        |
| <i>TIMI 3 flow postprocedure in all treated lesions</i>            | 58 (92.1) | 317 (91.9) | 2,573 (96.0) | 2,709 (96.5) | 295 (97.0) | 34 (89.5) | 24 (96.0) | < .001 |
| <i>Coronary stenosis after PCI &lt; 30% in all treated lesions</i> | 58 (92.1) | 330 (95.7) | 2,591 (96.7) | 2,712 (96.6) | 290 (95.4) | 36 (94.7) | 25 (10.0) | .299   |
| <i>Procedural success in all treated lesions</i>                   | 57 (9.5)  | 311 (9.1)  | 2,514 (93.8) | 2,654 (94.5) | 285 (93.8) | 34 (89.5) | 24 (96.0) | .038   |
| <i>Partial procedural success*</i>                                 | 0 (.0)    | 7 (2.0)    | 42 (1.6)     | 57 (2.0)     | 6 (2.0)    | 1 (2.6)   | 0 (.0)    | .735   |
| <i>Procedural failure</i>                                          | 3 (4.7)   | 12 (3.5)   | 57 (2.1)     | 59 (2.1)     | 6 (2.0)    | 2 (5.3)   | 0 (.0)    | .333   |
| <i>Treated vessel(s)</i>                                           |           |            |              |              |            |           |           |        |
| <i>Left main coronary artery</i>                                   | 8 (12.7)  | 25 (7.2)   | 99 (3.7)     | 96 (3.4)     | 15 (4.9)   | 2 (5.3)   | 2 (8.0)   | < .001 |
| <i>Left anterior descending artery</i>                             | 33 (52.4) | 189 (54.8) | 1,309 (48.9) | 1,374 (48.9) | 149 (49.0) | 20 (52.6) | 13 (52.0) | .546   |
| <i>Left circumflex artery</i>                                      | 16 (25.4) | 65 (18.8)  | 681 (25.4)   | 794 (28.3)   | 89 (29.3)  | 9 (23.7)  | 6 (24.0)  | .006   |

|                                              |           |            |             |              |            |           |           |      |
|----------------------------------------------|-----------|------------|-------------|--------------|------------|-----------|-----------|------|
| <i>Right coronary artery</i>                 | 24 (38.1) | 113 (32.8) | 902 (33.7)  | 906 (32.3)   | 106 (34.9) | 16 (42.1) | 9 (36.0)  | .692 |
| <i>Bypass graft</i>                          | 0 (.0)    | 5 (1.4)    | 15 (.6)     | 28 (1.0)     | 5 (1.6)    | 0 (.0)    | 0 (.0)    | .220 |
| <i>≥ 2 vessels treated</i>                   | 12 (19.0) | 43 (12.5)  | 299 (11.2)  | 369 (13.1)   | 53 (17.4)  | 8 (21.1)  | 3 (12.0)  | .009 |
| <i>Lesion(s) treated per patient</i>         |           |            |             |              |            |           |           | .173 |
| 1                                            | 50 (79.4) | 284 (82.6) | 2,147 (8.1) | 2,188 (78.0) | 223 (73.6) | 28 (73.7) | 20 (8.0)  |      |
| 2                                            | 12 (19.0) | 48 (14.0)  | 433 (16.2)  | 502 (17.9)   | 69 (22.8)  | 8 (21.1)  | 3 (12.0)  |      |
| ≥ 3                                          | 1 (1.6)   | 12 (3.5)   | 99 (3.7)    | 115 (4.1)    | 11 (3.6)   | 2 (5.3)   | 2 (8.0)   |      |
| <i>Number of stents per patient</i>          | 1.6 ± 1.2 | 1.4 ± .9   | 1.4 ± .9    | 1.4 ± .8     | 1.6 ± 1.0  | 1.5 ± .9  | 1.6 ± 1.1 | .062 |
| <i>Overall stent length per patient (mm)</i> | 36 ± 23   | 32 ± 20    | 31 ± 20     | 32 ± 19      | 35 ± 22    | 33 ± 21   | 36 ± 25   | .042 |

ACE, angiotensin-converting enzyme; BMI, body mass index; CABG, coronary artery bypass grafting; CAD, coronary artery disease; COPD, chronic obstructive pulmonary disease; eGFR, estimated glomerular filtration rate; IABP, intra-aortic balloon pump; LVEF, left ventricular ejection fraction; MI, myocardial infarction; NSTEMI, non-ST-elevation myocardial infarction; PCI, percutaneous coronary intervention; STEMI, ST-elevation myocardial infarction; TIA, transient ischemic attack; TIMI, Thrombolysis in Myocardial Infarction; WBC, white blood cell.

The data are expressed as No. (%) or mean ± standard deviation.

\*TIMI 3 flow and coronary stenosis less than 30% in at least 1 lesion.

**Supplementary Table 4.** Multivariate predictors of platelet count changes > 30%

|                                                                    | Platelet count drop > 30%     |        | Platelet count increase > 30% |        |
|--------------------------------------------------------------------|-------------------------------|--------|-------------------------------|--------|
|                                                                    | OR <sub>adj</sub><br>(95% CI) | P      | OR <sub>adj</sub><br>(95% CI) | P      |
| <i>Age, y</i>                                                      | 1.02 (1.01-1.03)              | .005   | 0.99 (0.97-1.02)              | .592   |
| <i>BMI, per kg/m<sup>2</sup></i>                                   | 1.00 (0.97-1.03)              | .944   | 0.97 (0.91-1.03)              | .278   |
| <i>Male sex</i>                                                    | 1.02 (0.79-1.33)              | .882   | 0.68 (0.37-1.24)              | .207   |
| <i>Diabetes mellitus</i>                                           | 0.99 (0.76-1.28)              | .909   | 0.89 (0.49-1.62)              | .707   |
| <i>Peripheral vascular disease</i>                                 | 1.19 (0.82-1.73)              | .360   | 0.85 (0.35-2.07)              | .725   |
| <i>COPD</i>                                                        | 1.87 (1.29-2.69)              | .001   | 0.84 (0.31-2.31)              | .737   |
| <i>Killip class</i>                                                |                               |        |                               |        |
| I                                                                  | Reference                     |        | Reference                     |        |
| II                                                                 | 1.16 (0.80-1.68)              | .422   | 1.96 (0.92-4.15)              | .080   |
| III                                                                | 1.16 (0.62-2.16)              | .645   | 1.53 (0.34-6.89)              | .582   |
| IV                                                                 | 1.37 (0.64-2.93)              | .414   | -                             | -      |
| <i>STEMI at presentation</i>                                       | 2.81 (2.15-3.66)              | < .001 | 1.24 (0.73-2.10)              | .432   |
| <i>Baseline hemoglobin values, per g/dL</i>                        | 1.02 (0.96-1.08)              | .599   | 0.83 (0.73-0.96)              | .010   |
| <i>Baseline platelet count, per 1000/<math>\mu</math>L</i>         | 1.01 (1.00-1.01)              | < .001 | 0.98 (0.98-0.99)              | < .001 |
| <i>Baseline white blood cell count, per 1000/<math>\mu</math>L</i> | 1.07 (1.05-1.10)              | < .001 | 1.06 (1.01-1.12)              | .032   |
| <i>eGFR, per mL/min/1.73 m<sup>2</sup></i>                         | 0.99 (0.98-0.99)              | < .001 | 1.00 (0.99-1.01)              | .977   |
| <i>CABG</i>                                                        | 13.00 (4.97-34.02)            | < .001 | 1.20 (0.12-11.73)             | .878   |
| <i>IABP</i>                                                        | 6.23 (3.95-9.82)              | < .001 | -                             | -      |
| <i>PCI completed</i>                                               | 1.68 (0.99-2.85)              | .054   | 0.64 (0.25-1.60)              | .336   |
| <i>Total amount of injected contrast, per mL</i>                   | 1.00 (0.99-1.00)              | .553   | 1.00 (0.99-1.00)              | .403   |
| <i>Radial access (randomization)</i>                               | 0.86 (0.70-1.07)              | .174   | 1.62 (0.98-2.67)              | .060   |
| <i>Bivalirudin (randomization)</i>                                 | 0.78 (0.62-0.98)              | .031   | 0.91 (0.55-1.50)              | .702   |
| <i>P2Y<sub>12</sub> inhibitor in the cath lab</i>                  |                               |        |                               |        |
| No                                                                 | Reference                     |        | Reference                     |        |
| Clopidogrel                                                        | 1.19 (0.80-1.75)              | .388   | 1.03 (0.40-2.66)              | .951   |
| Ticagrelor                                                         | 0.92 (0.65-1.27)              | .584   | 1.49 (0.73-3.06)              | .273   |
| Prasugrel                                                          | 0.66 (0.44-1.01)              | .055   | 0.77 (0.27-2.24)              | .633   |
| <i>GP IIb/IIIa inhibitor in the cath lab</i>                       | 1.23 (0.92-1.63)              | .156   | 0.70 (0.31-1.56)              | .380   |

BMI, body mass index; CABG, coronary artery bypass grafting; cath lab, catheterization laboratory; COPD, chronic obstructive pulmonary disease; eGFR, estimated glomerular filtration rate; GP, glycoprotein; IABP, intra-aortic balloon pump; OR<sub>adj</sub>, adjusted odds ratio; PCI, percutaneous coronary intervention; STEMI, ST-elevation myocardial infarction.

**Supplementary Table 5.** Multivariable association of alternative platelet count thresholds (< 150 000/ $\mu$ L and > 400 000/ $\mu$ L) and mortality and bleeding

|                                | Mortality  |                               |          | Bleeding   |                               |          |
|--------------------------------|------------|-------------------------------|----------|------------|-------------------------------|----------|
|                                | Rate,<br>% | HR <sub>adj</sub><br>(95% CI) | <i>P</i> | Rate,<br>% | HR <sub>adj</sub><br>(95% CI) | <i>P</i> |
| <i>Baseline platelet count</i> |            |                               |          |            |                               |          |
| < 150 000/ $\mu$ L             | 4.9        | 0.93<br>(0.63-1.37)           | .717     | 9.7        | 1.13<br>(0.86-1.48)           | .383     |
| 150 000-400 000/ $\mu$ L       | 3.4        | Reference                     |          | 7.6        | Reference                     |          |
| > 400 000/ $\mu$ L             | 7.5        | 1.10<br>(0.57-2.11)           | .777     | 14.2       | 1.51<br>(0.95-2.40)           | .081     |
| <i>Nadir platelet count</i>    |            |                               |          |            |                               |          |
| < 150 000/ $\mu$ L             | 6.1        | 1.32<br>(1.00-1.74)           | .050     | 11.9       | 1.53<br>(1.26-1.86)           | < .001   |
| 150 000-400 000/ $\mu$ L       | 3.0        | Reference                     |          | 7.1        | Reference                     |          |
| > 400 000/ $\mu$ L             | 8.3        | 1.44<br>(0.58-3.56)           | .430     | 10.0       | 1.11<br>(0.49-2.49)           | .809     |

HR<sub>adj</sub>, adjusted hazard ratio.

**Supplementary Table 6. Causes of mortality across groups of platelet count changes**

| Groups                  | Cause of death                                                                                                                                                                                                                                                                                                                                                                                                                                                                                                                                                                                                                                                                                                                                                                                                                                                                                                                                                                 |
|-------------------------|--------------------------------------------------------------------------------------------------------------------------------------------------------------------------------------------------------------------------------------------------------------------------------------------------------------------------------------------------------------------------------------------------------------------------------------------------------------------------------------------------------------------------------------------------------------------------------------------------------------------------------------------------------------------------------------------------------------------------------------------------------------------------------------------------------------------------------------------------------------------------------------------------------------------------------------------------------------------------------|
| <b>Drop &gt;10%</b>     | <p><i>Cardiovascular (n = 85, 55.9%)</i></p> <ul style="list-style-type: none"> <li>- Acute MI (n = 31, 20.4%)</li> <li>- Sudden cardiac death (n = 24, 15.8%)</li> <li>- Heart failure (n = 19, 12.5%)</li> <li>- Stroke (n = 2, 1.3%)</li> <li>- CV hemorrhage (n = 2, 1.3%)</li> <li>- CV procedure (n = 3, 2.0%)</li> <li>- Other CV causes (n = 4, 2.6%)</li> </ul> <p><i>Noncardiovascular (n = 41, 27.0%)</i></p> <ul style="list-style-type: none"> <li>- Non-CV hemorrhage (n = 2, 1.3%)</li> <li>- Non-CV procedure or surgery (n = 0, 0.0%)</li> <li>- Trauma (n = 0, 0.0%)</li> <li>- Suicide (n = 0, 0.0%)</li> <li>- Malignancy (n = 14, 9.2%)</li> <li>- Pulmonary (n = 9, 5.9%)</li> <li>- Renal (n = 2, 1.3%)</li> <li>- Gastro-intestinal (n = 5, 3.3%)</li> <li>- Hepatobiliary (n = 1, 0.7%)</li> <li>- Pancreatic (n = 0, 0.0%)</li> <li>- Infection (n = 7, 4.6%)</li> <li>- Neurological (n = 1, 0.7%)</li> </ul> <p><i>Unknown (n = 26, 17.1%)</i></p> |
| <b>Reference</b>        | <p><i>Cardiovascular (n = 51, 56.0%)</i></p> <ul style="list-style-type: none"> <li>- Acute MI (n = 16, 17.6%)</li> <li>- Sudden cardiac death (n = 6, 6.6%)</li> <li>- Heart failure (n = 14, 15.4%)</li> <li>- Stroke (n = 4, 4.4%)</li> <li>- CV hemorrhage (n = 5, 5.5%)</li> <li>- CV procedure (n = 4, 4.4%)</li> <li>- Other CV causes (n = 2, 2.2%)</li> </ul> <p><i>Noncardiovascular (n = 25, 27.5%)</i></p> <ul style="list-style-type: none"> <li>- Non-CV hemorrhage (n = 0, 0.0%)</li> <li>- Non-CV procedure or surgery (n = 0, 0.0%)</li> <li>- Trauma (n = 2, 2.2%)</li> <li>- Suicide (n = 1, 1.1%)</li> <li>- Malignancy (n = 10, 11.0%)</li> <li>- Pulmonary (n = 4, 4.4%)</li> <li>- Renal (n = 1, 1.1%)</li> <li>- Gastro-intestinal (n = 1, 1.1%)</li> <li>- Hepatobiliary (n = 0, 0.0%)</li> <li>- Pancreatic (n = 0, 0.0%)</li> <li>- Infection (n = 6, 6.6%)</li> <li>- Neurological (n = 0, 0.0%)</li> </ul> <p><i>Unknown (n = 15, 16.5%)</i></p>  |
| <b>Increase &gt;10%</b> | <p><i>Cardiovascular (n = 16, 51.6%)</i></p> <ul style="list-style-type: none"> <li>- Acute MI (n = 6, 19.4%)</li> <li>- Sudden cardiac death (n = 3, 9.7%)</li> <li>- Heart failure (n = 1, 3.2%)</li> <li>- Stroke (n = 1, 3.2%)</li> </ul>                                                                                                                                                                                                                                                                                                                                                                                                                                                                                                                                                                                                                                                                                                                                  |



|  |                                                                                                                                                                                                                                                                                                                                                                                                                                                                                                                                                                                                                                                                                                                                                                    |
|--|--------------------------------------------------------------------------------------------------------------------------------------------------------------------------------------------------------------------------------------------------------------------------------------------------------------------------------------------------------------------------------------------------------------------------------------------------------------------------------------------------------------------------------------------------------------------------------------------------------------------------------------------------------------------------------------------------------------------------------------------------------------------|
|  | <ul style="list-style-type: none"> <li>- CV hemorrhage (n = 0, 0.0%)</li> <li>- CV procedure (n = 3, 9.7%)</li> <li>- Other CV causes (n = 2, 6.5%)</li> </ul> <p><i>Noncardiovascular (n = 9, 29.0%)</i></p> <ul style="list-style-type: none"> <li>- Non-CV hemorrhage (n = 0, 0.0%)</li> <li>- Non-CV procedure or surgery (n = 1, 3.2%)</li> <li>- Trauma (n = 0, 0.0%)</li> <li>- Suicide (n = 0, 0.0%)</li> <li>- Malignancy (n = 2, 6.5%)</li> <li>- Pulmonary (n = 1, 3.2%)</li> <li>- Renal (n = 0, 0.0%)</li> <li>- Gastro-intestinal (n = 0, 0.0%)</li> <li>- Hepatobiliary (n = 0, 0.0%)</li> <li>- Pancreatic (n = 1, 3.2%)</li> <li>- Infection (n = 4, 12.9%)</li> <li>- Neurological (n = 0, 0.0%)</li> </ul> <p><i>Unknown (n = 6, 19.4%)</i></p> |
|--|--------------------------------------------------------------------------------------------------------------------------------------------------------------------------------------------------------------------------------------------------------------------------------------------------------------------------------------------------------------------------------------------------------------------------------------------------------------------------------------------------------------------------------------------------------------------------------------------------------------------------------------------------------------------------------------------------------------------------------------------------------------------|

CV, cardiovascular; MI, myocardial infarction.

**Supplementary figure 1.** Sankey diagram for transition of thrombocytopenia ( $< 150\,000/\mu\text{L}$ ), normal platelet count ( $150\,000\text{--}400\,000/\mu\text{L}$ ), and thrombocytosis ( $> 400\,000/\mu\text{L}$ ) rates from baseline to nadir.

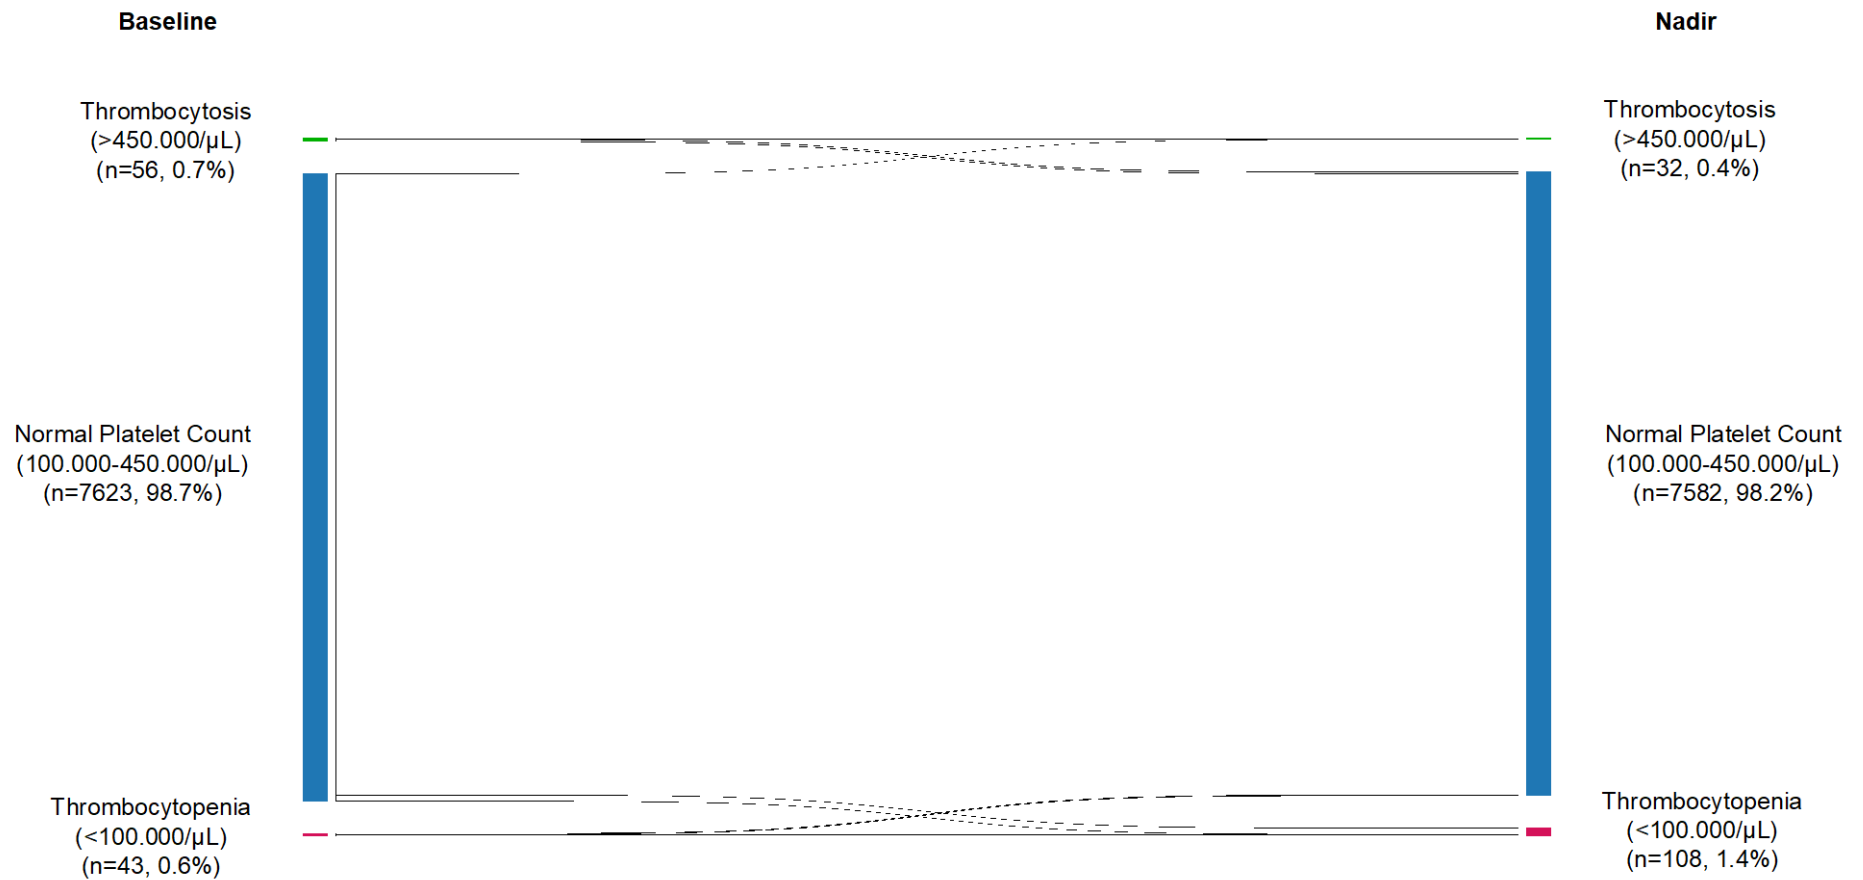

**Supplementary figure 2.** Sankey diagram for transition of thrombocytopenia ( $< 150\,000/\mu\text{L}$ ), normal platelet count ( $150\,000\text{--}400\,000/\mu\text{L}$ ), and thrombocytosis ( $> 400\,000/\mu\text{L}$ ) rates from baseline to nadir.

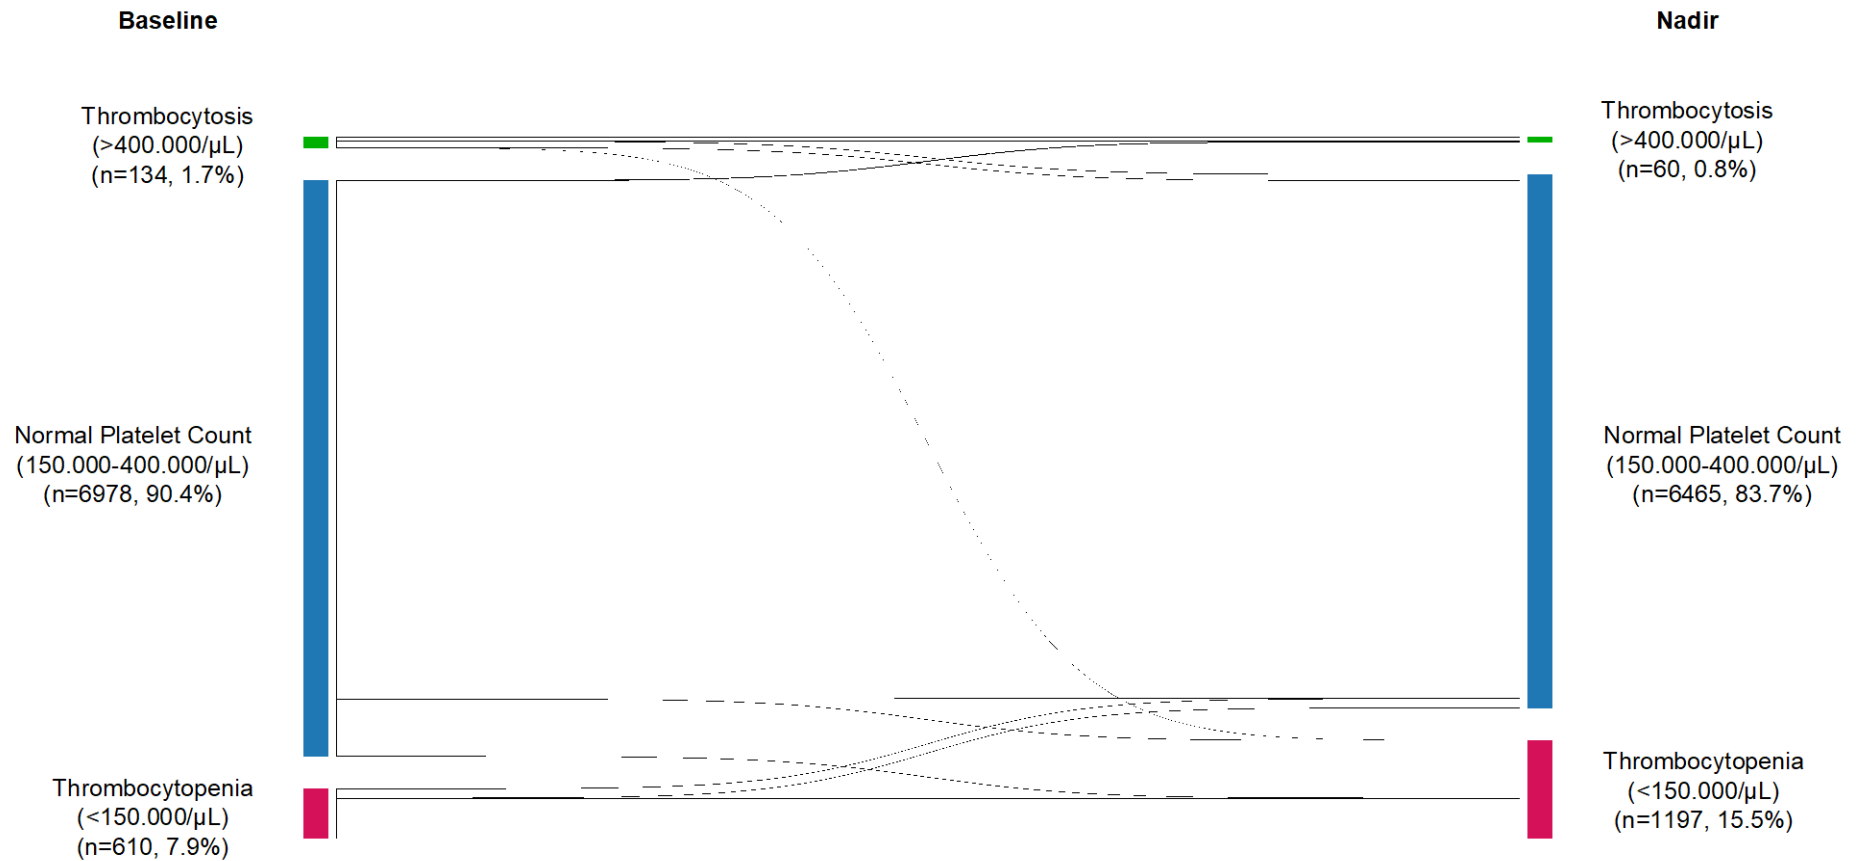

**Supplementary figure 3.** Histogram of the distribution of relative changes in platelet count.

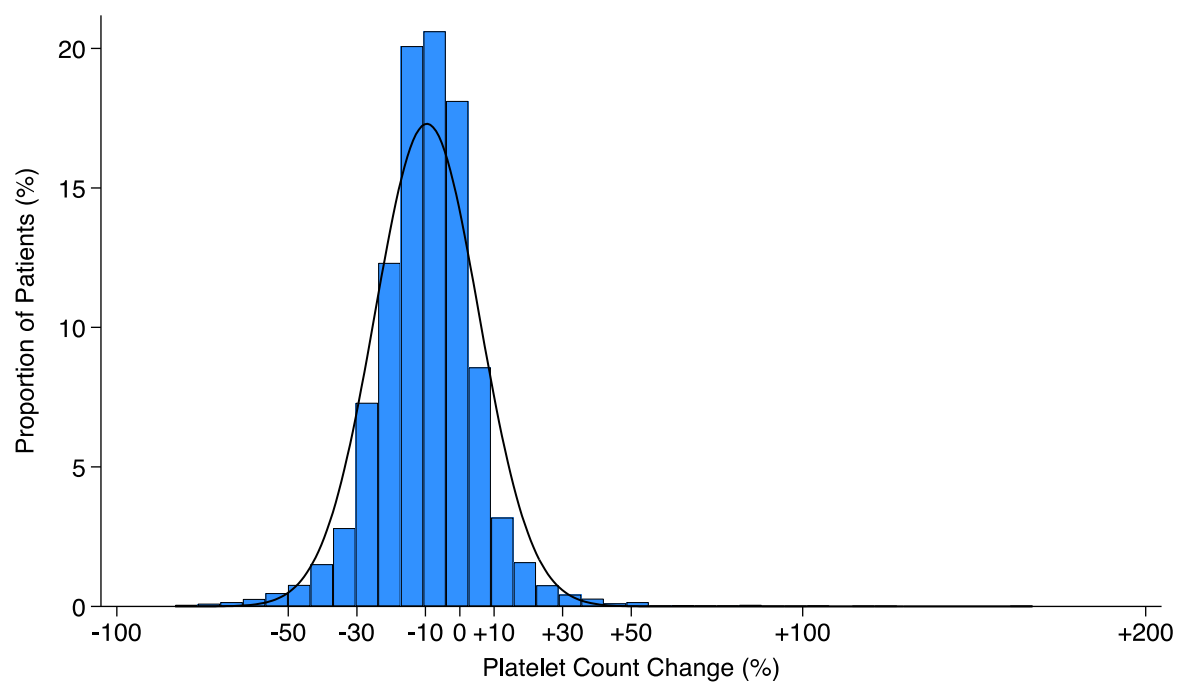

**Supplementary figure 4.** Rates of platelet count changes > 30% across randomized treatments.

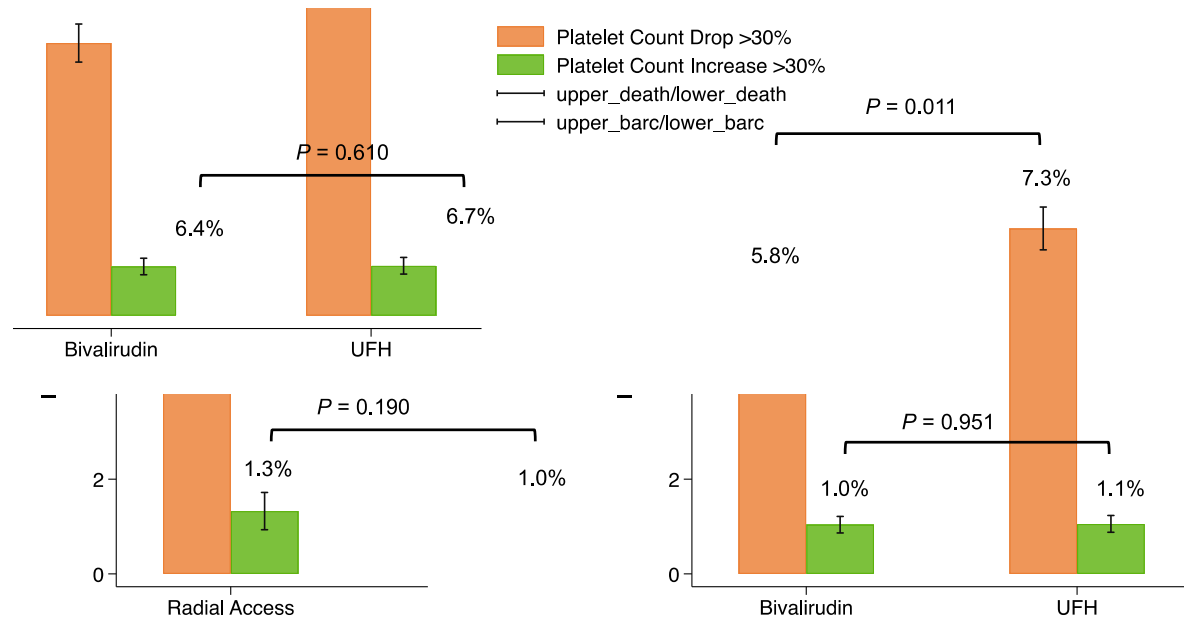

**Supplementary figure 5.** Spline functions of relative changes in platelet count on a continuous scale and 1-year mortality and bleeding stratified according to platelet count <100 000/ $\mu$ L at baseline.

\*Only 43 patients had a platelet count < 100 000/ $\mu$ L at baseline. (A) Mortality. (B) Bleeding.

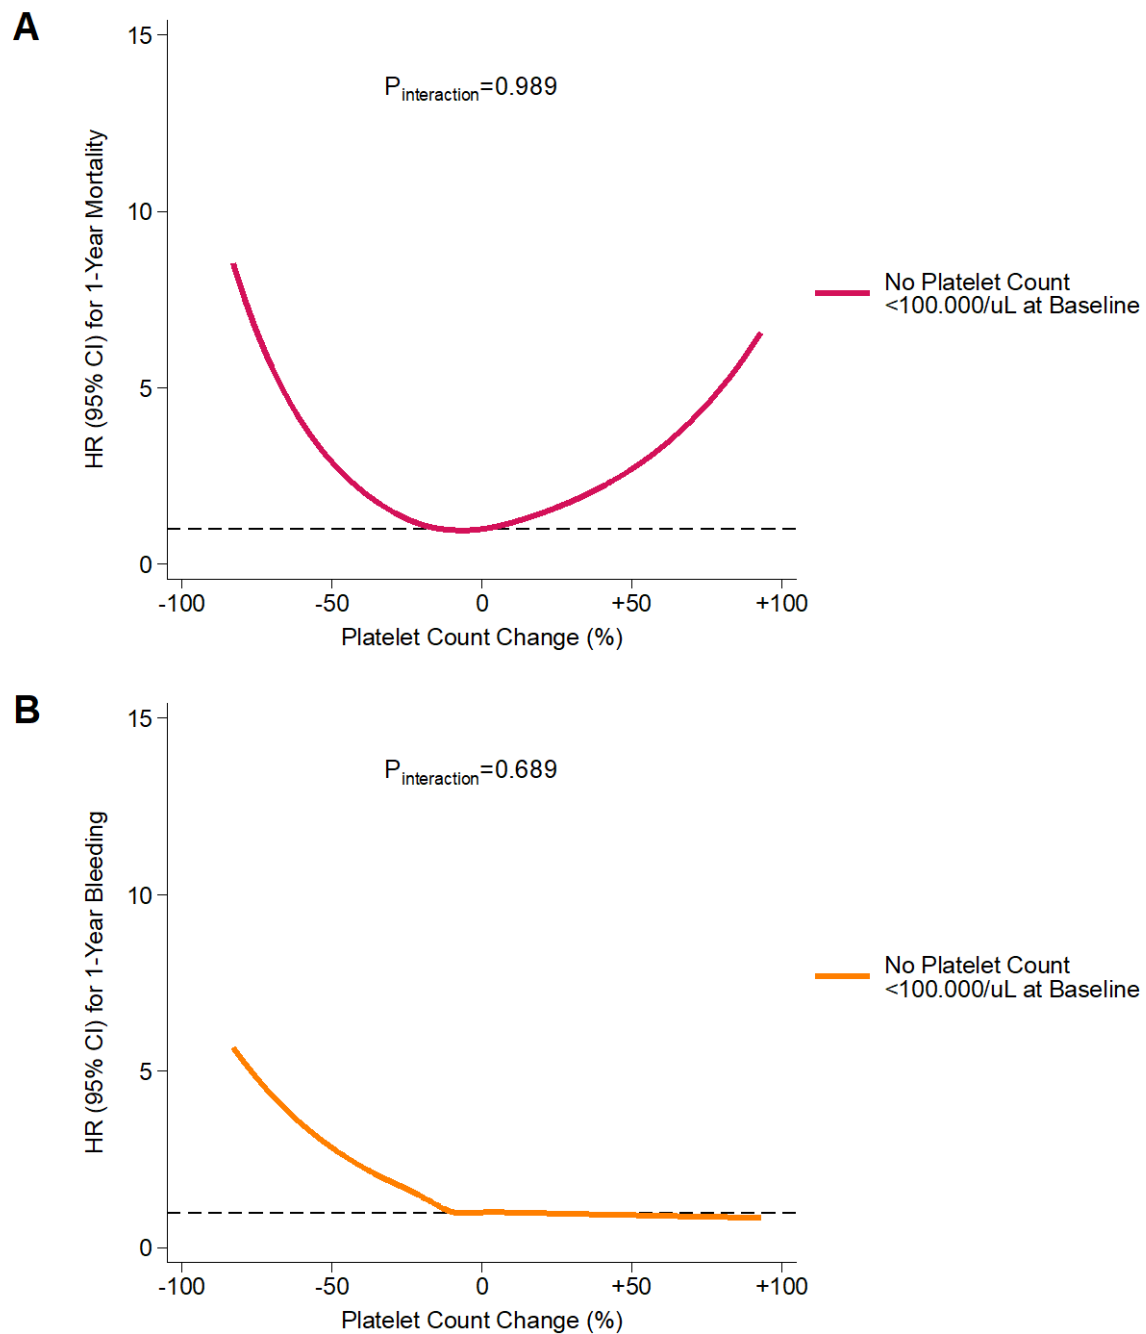

**Supplementary figure 6.** Spline functions of relative changes in platelet count on a continuous scale and 1-year mortality and bleeding stratified according to platelet count  $> 450\,000/\mu\text{L}$  at baseline.

\*Only 56 patients had a platelet count  $> 450\,000/\mu\text{L}$  at baseline. (A) Mortality. (B) Bleeding.

**A**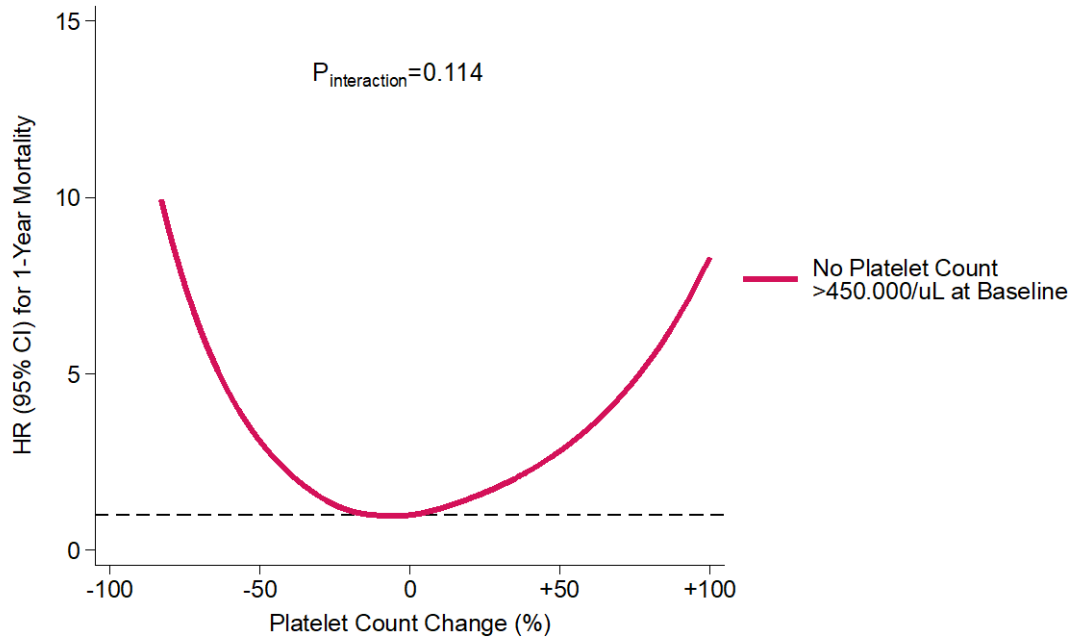**B**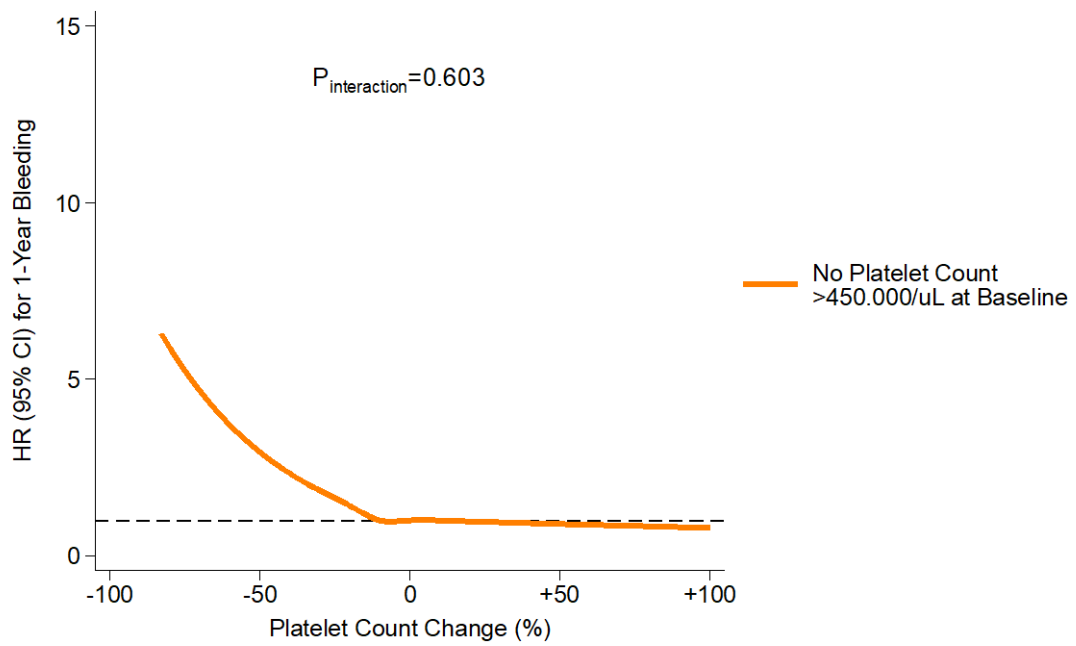



**Supplementary figure 7.** Spline functions of relative changes in platelet count on a continuous scale and 1-year mortality and bleeding stratified according to platelet count < 100 000/ $\mu$ L at nadir.

\*Only 108 patients had a platelet count < 100 000/ $\mu$ L at nadir. (A) Mortality. (B) Bleeding.

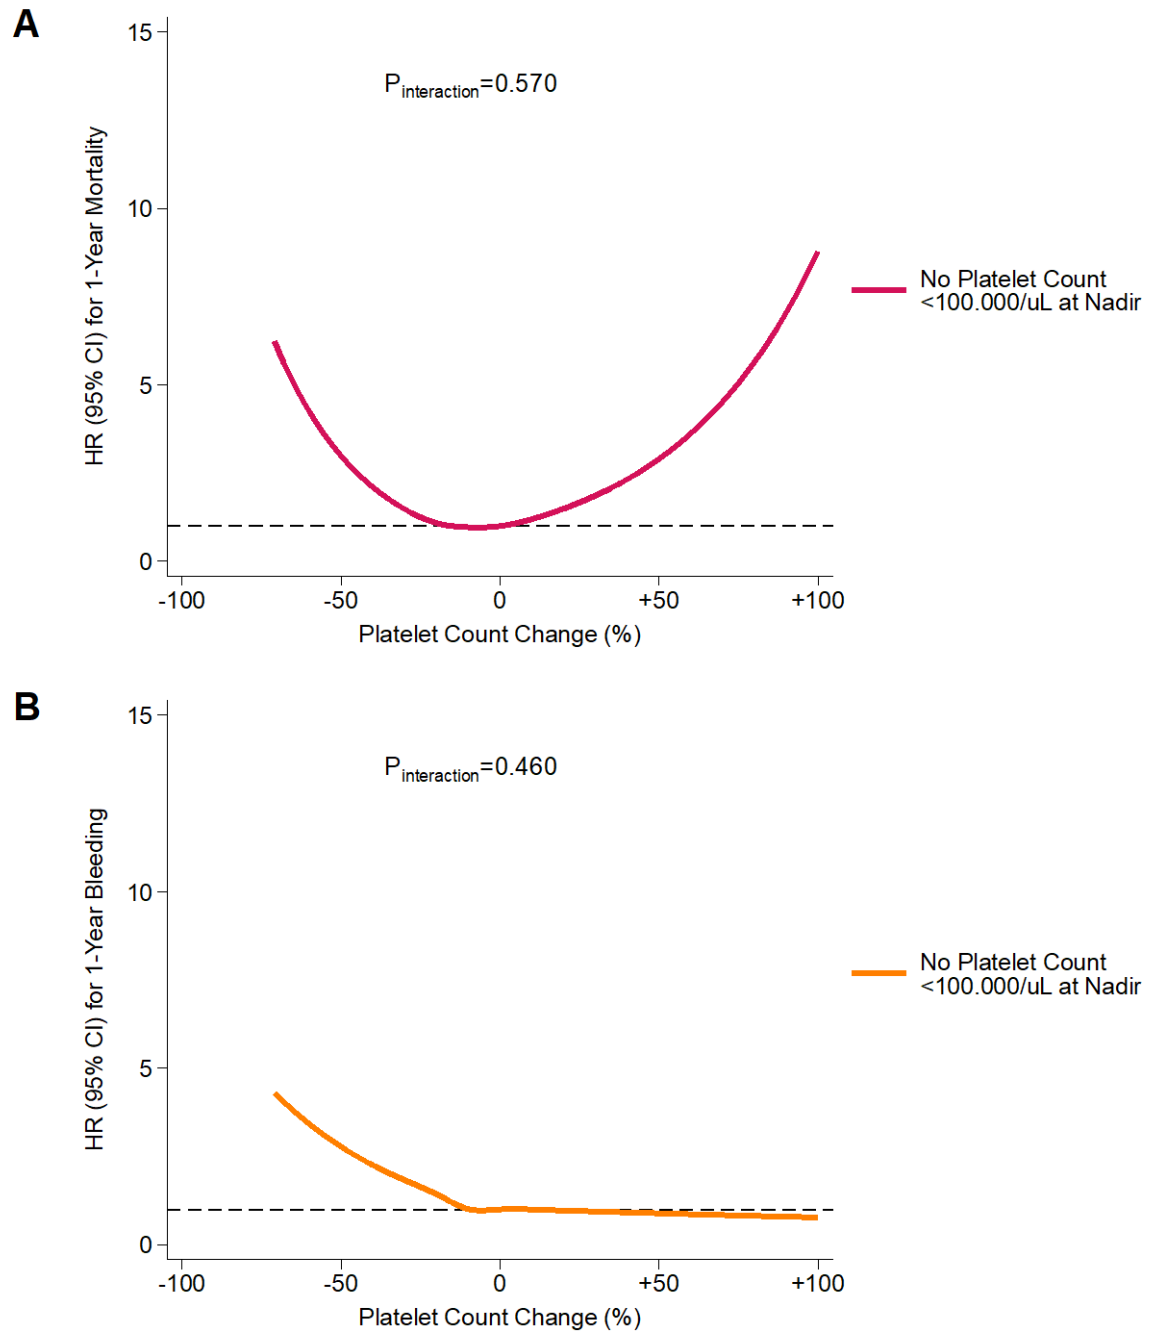

**Supplementary figure 8.** Spline functions of relative changes in platelet count on a continuous scale and 1-year mortality and bleeding stratified according to platelet count  $>450\,000/\mu\text{L}$  at nadir.

\*Only 32 patients had a platelet count  $>450\,000/\mu\text{L}$  at nadir. (A) Mortality. (B) Bleeding.

**A**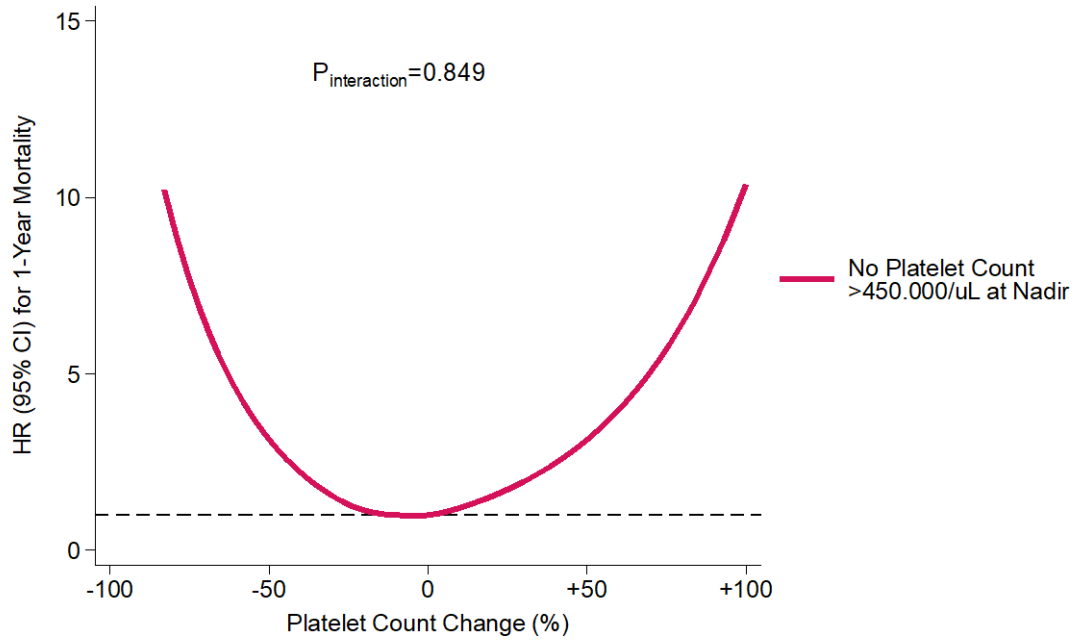**B**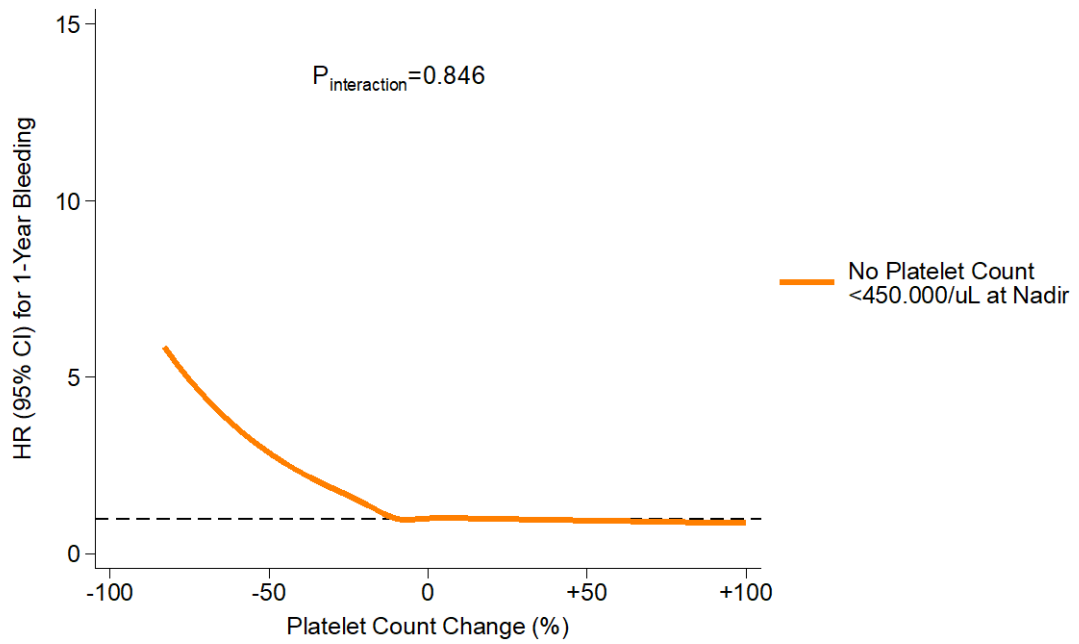

**Supplementary figure 9.** Spline functions of relative changes in platelet count on a continuous scale and 1-year mortality and bleeding stratified according to platelet count < 150 000/ $\mu$ L at baseline.

(A) Mortality. (B) Bleeding.

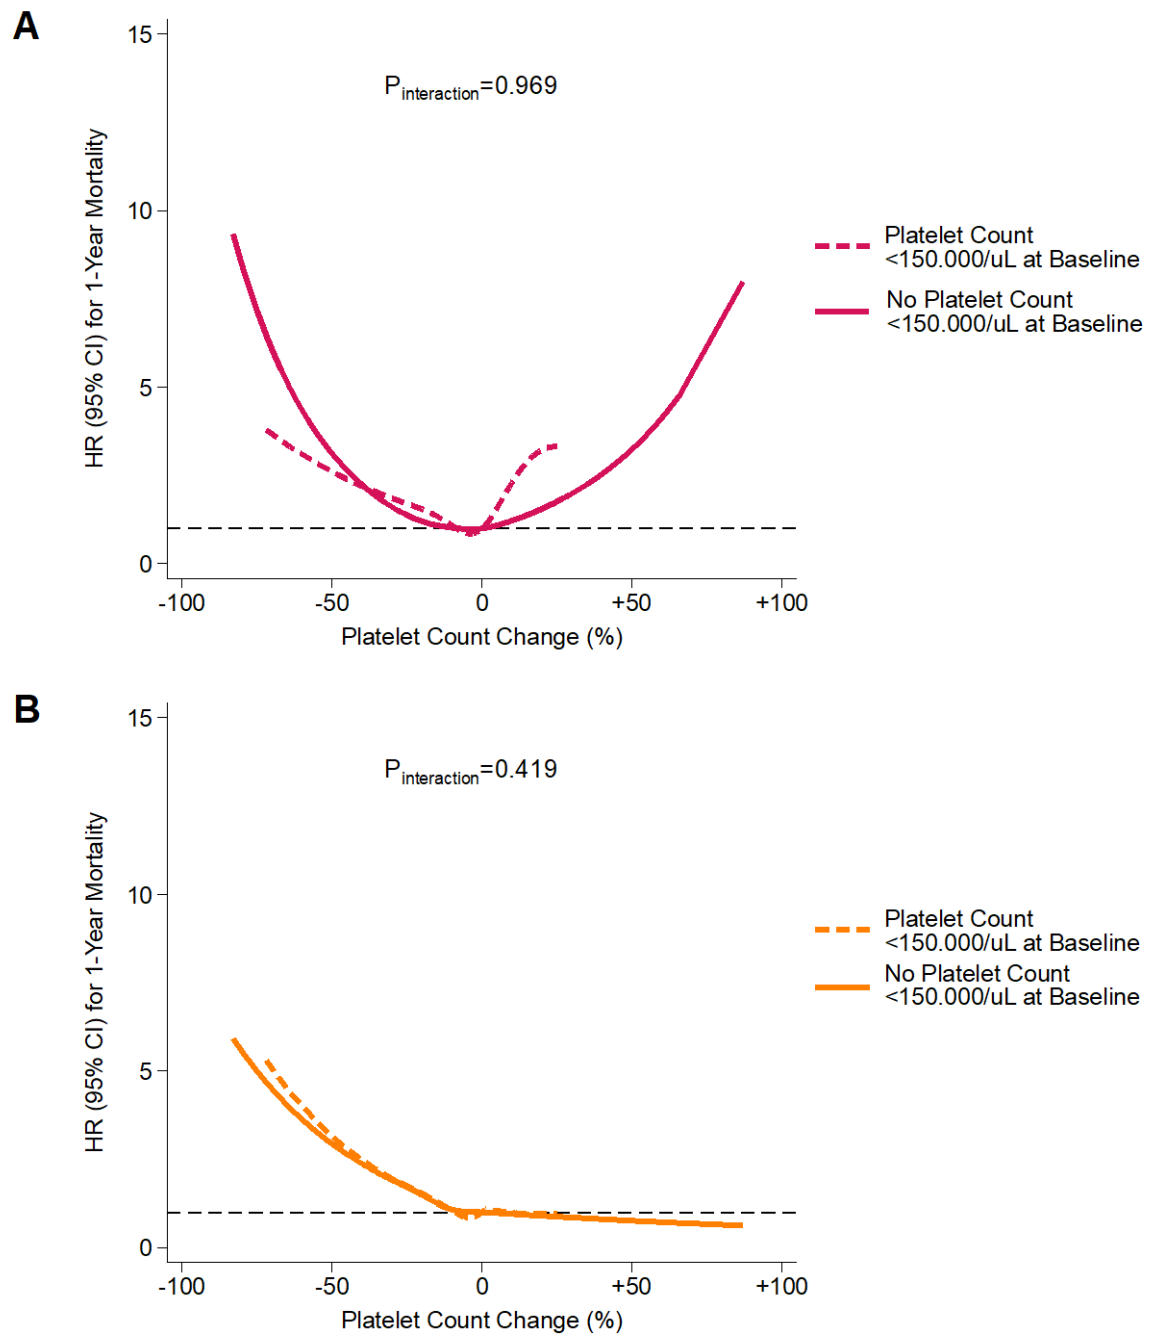

**Supplementary figure 10.** Spline functions of relative changes in platelet count on a continuous scale and 1-year mortality and bleeding stratified according to platelet count > 400 000/ $\mu$ L at baseline.

\*Only 134 patients had a platelet count > 400 000/ $\mu$ L at baseline. (A) Mortality. (B) Bleeding.

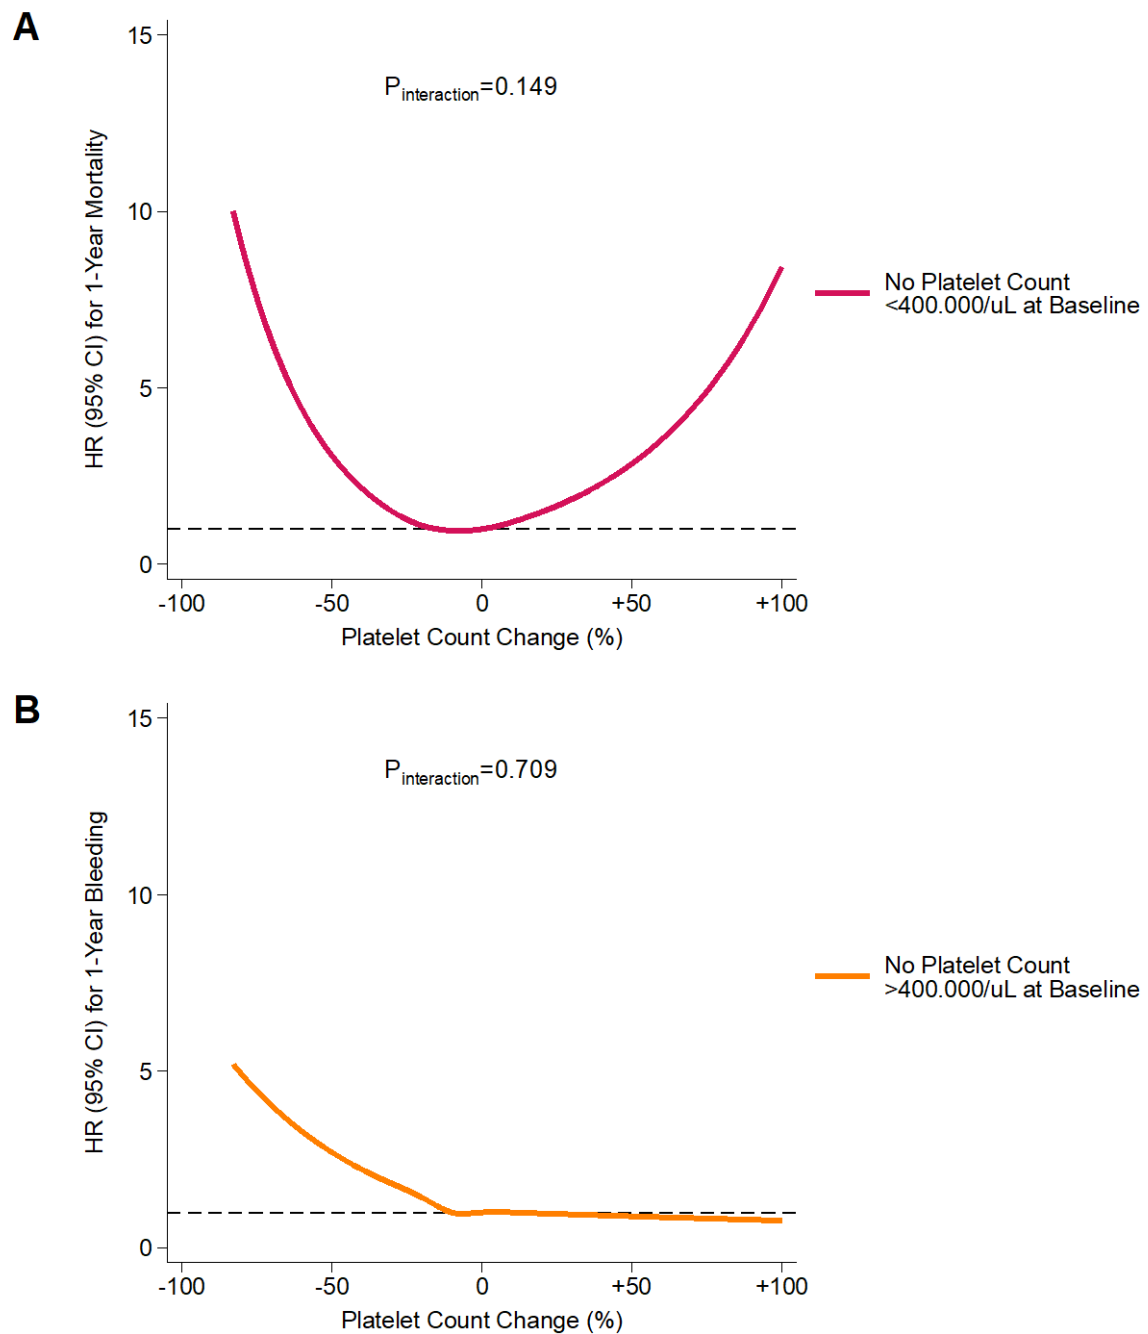

**Supplementary figure 11.** Spline functions of relative changes in platelet count on a continuous scale and 1-year mortality and bleeding stratified according to platelet count <150 000/ $\mu$ L at nadir.

(A) Mortality. (B) Bleeding.

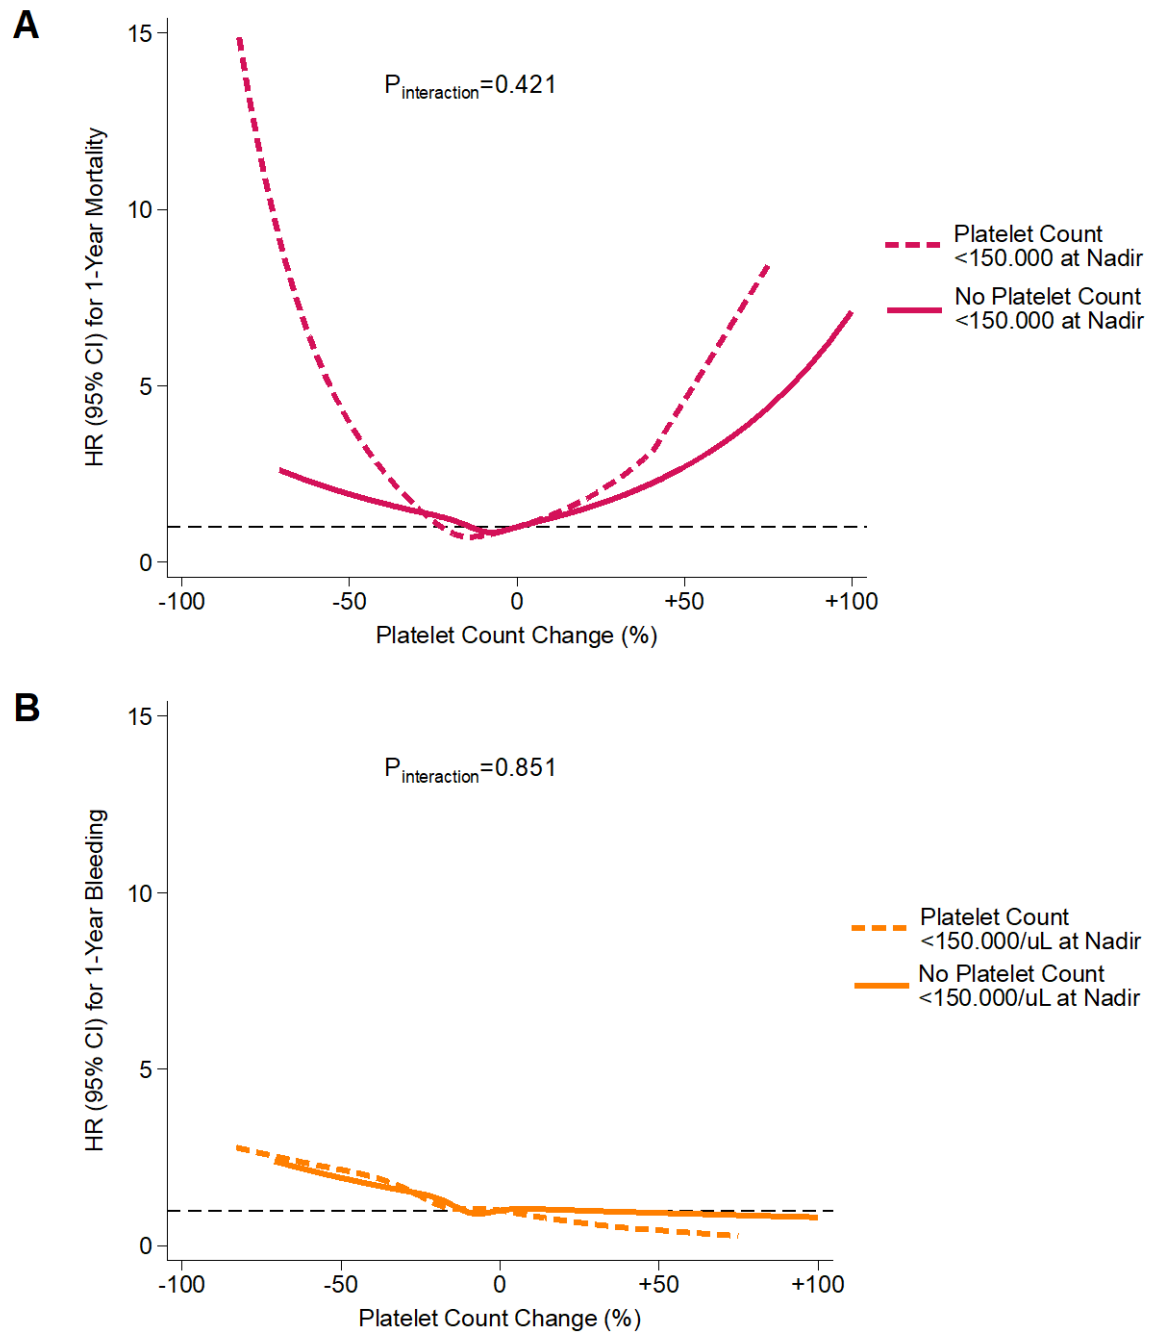

**Supplementary figure 12.** Spline functions of relative changes in platelet count on a continuous scale and 1-year mortality and bleeding stratified according to platelet count > 400 000/ $\mu$ L at nadir.

\*Only 60 patients had a platelet count > 400 000/ $\mu$ L at nadir. (A) Mortality. (B) Bleeding.

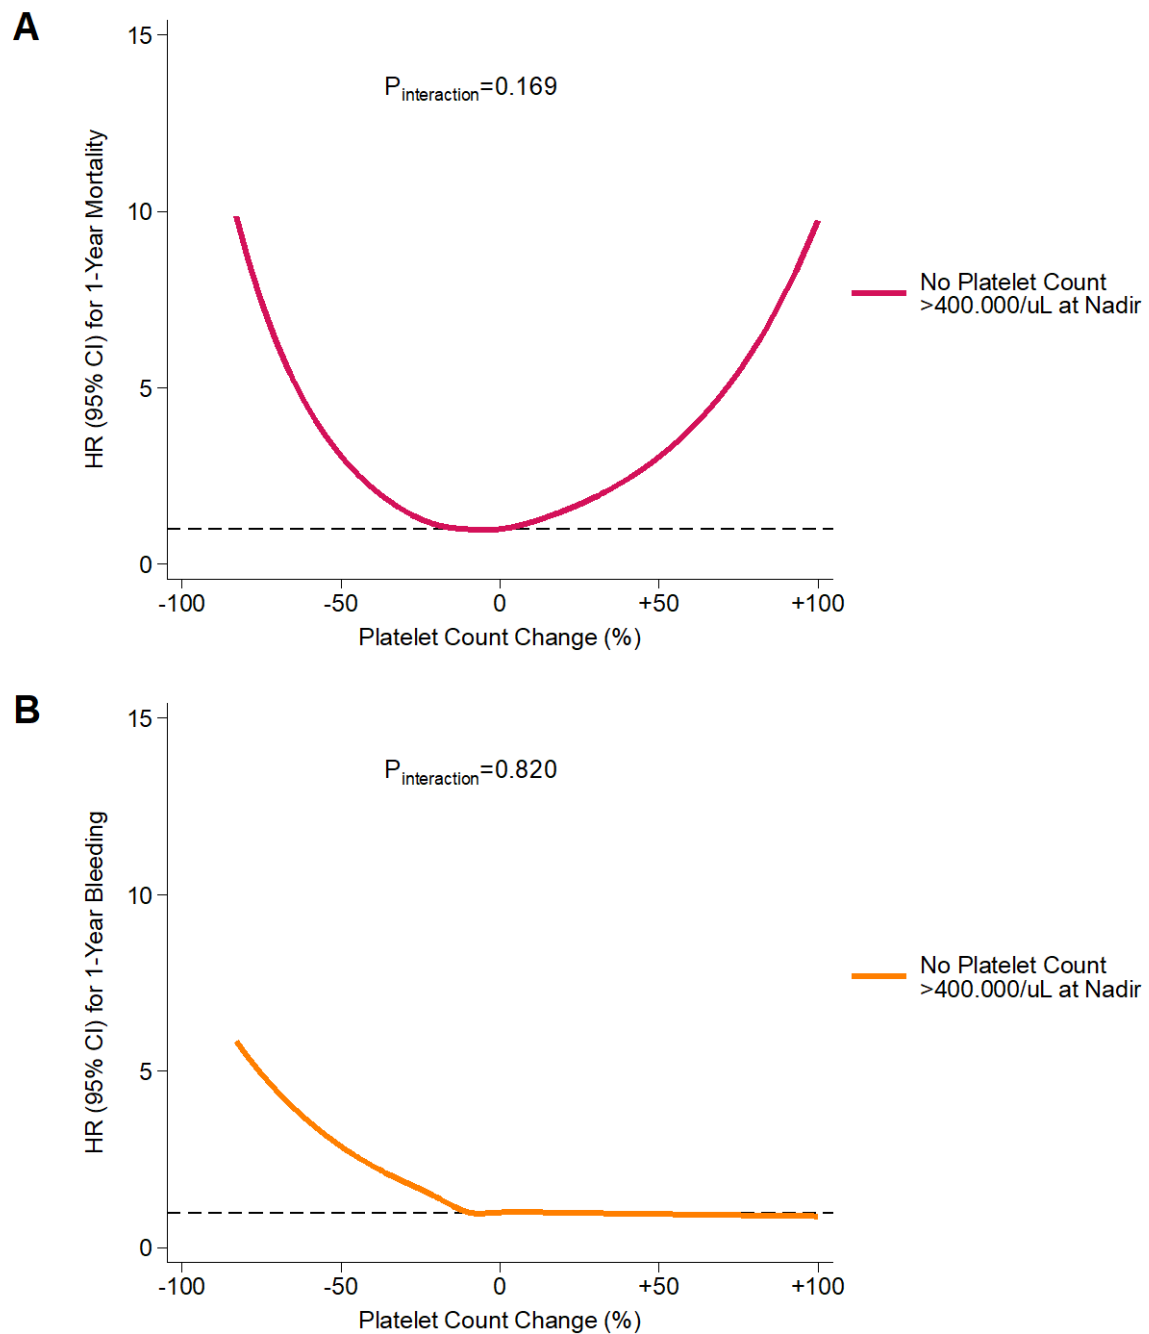

**Supplementary figure 13.** Spline functions of relative changes in platelet count on a continuous scale and 1-year mortality and bleeding stratified according to randomization to radial access vs femoral access.

(A) Mortality. (B) Bleeding.

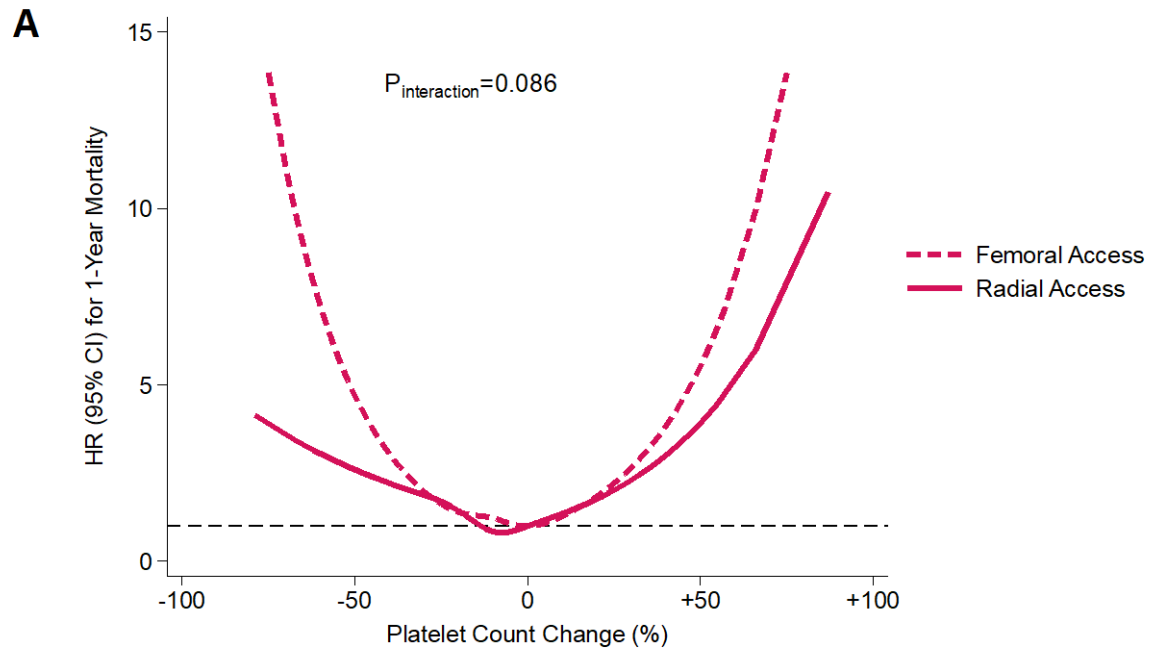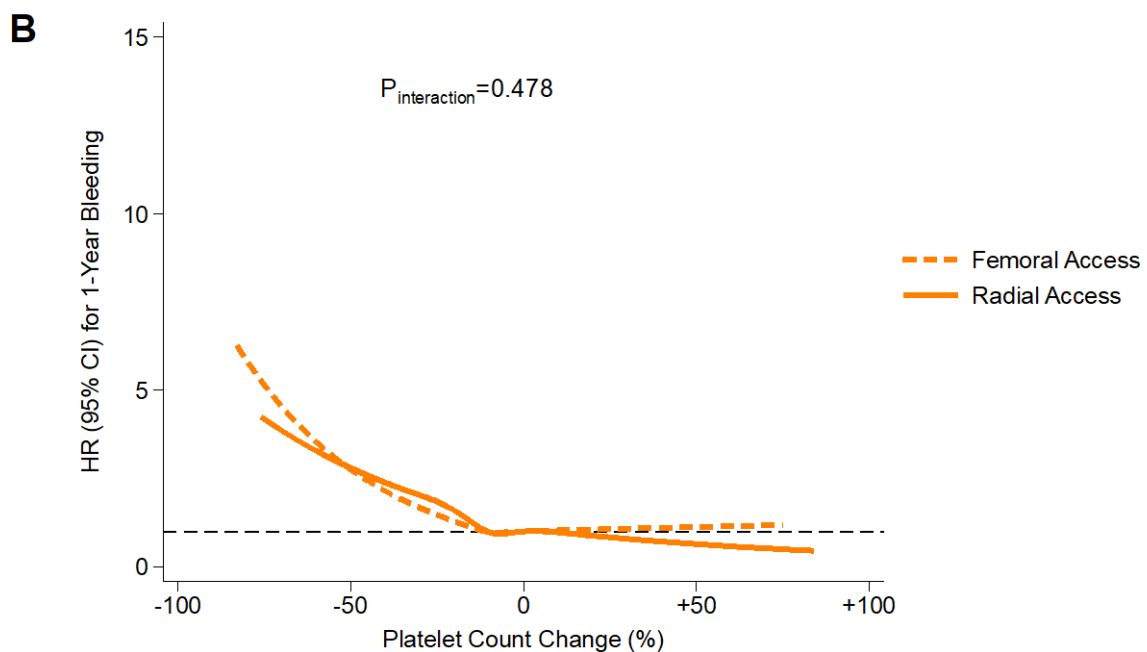



**Supplementary Figure 14.** Spline functions of relative changes in platelet count on a continuous scale and 1-year mortality and bleeding stratified according to randomization to bivalirudin vs UFH.

(A) Mortality. (B) Bleeding.

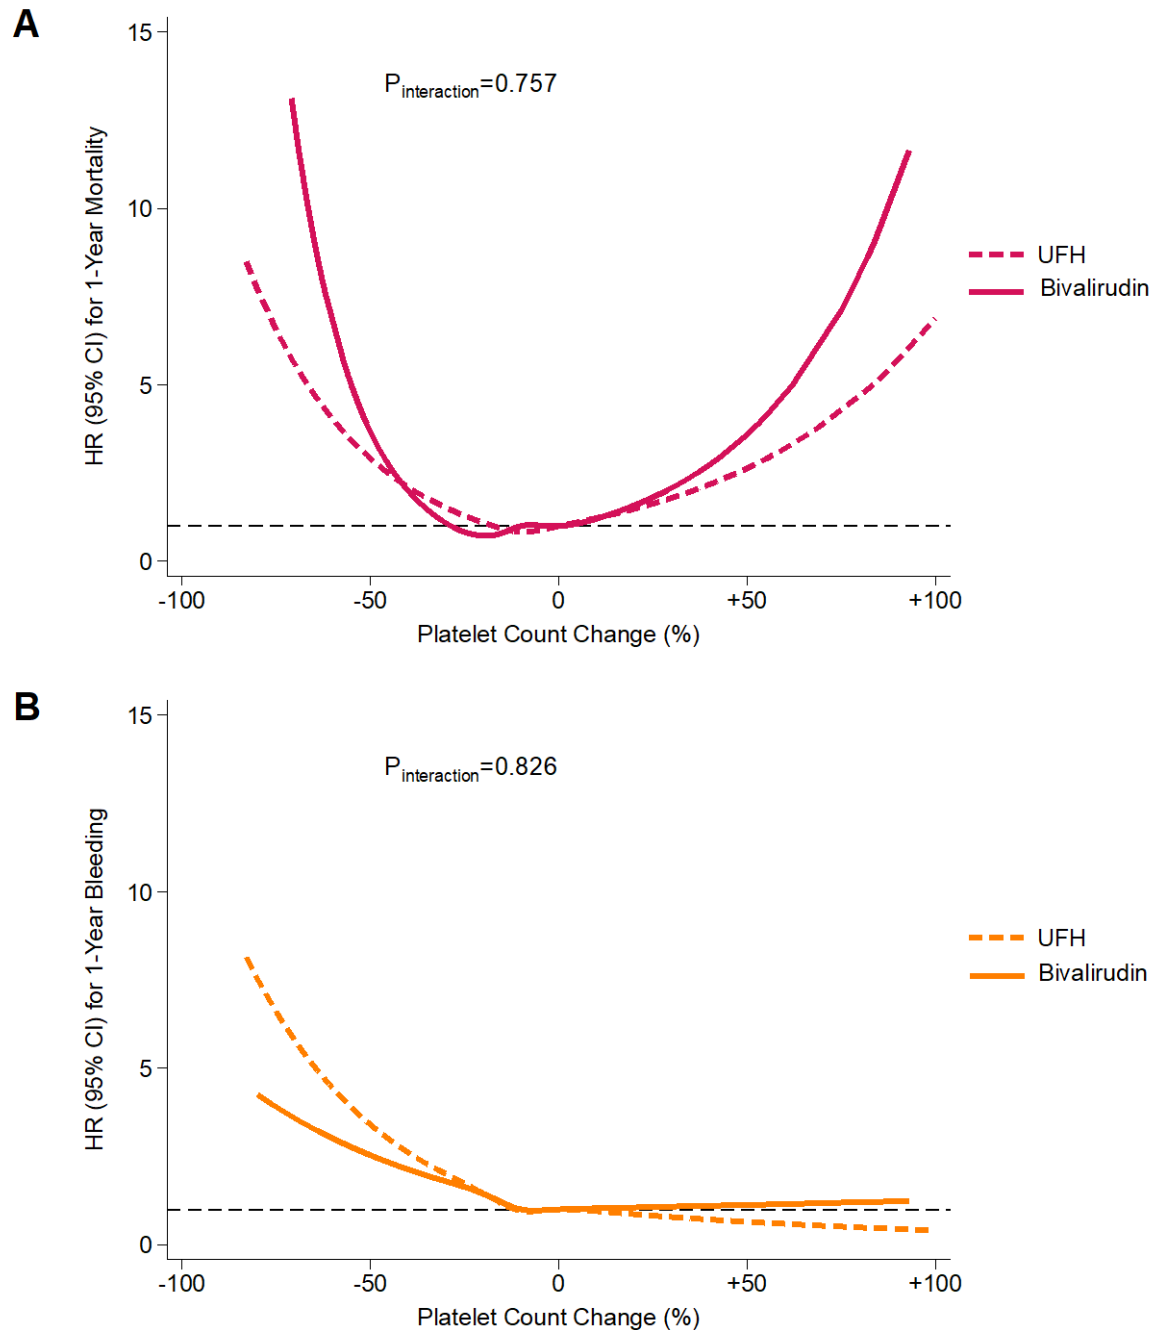

**Supplementary Figure 15.** Spline functions of relative changes in platelet count on a continuous scale and 1-year mortality and bleeding stratified according to age  $\geq 75$  years.

**Supplementary Figure 16.** Spline functions of relative changes in platelet count on a continuous scale and 1-year mortality and bleeding stratified according to diabetes mellitus.

**Supplementary Figure 17.** Spline functions of relative changes in platelet count on a continuous scale and 1-year mortality and bleeding stratified according to renal failure.

**Supplementary Figure 18.** Spline functions of relative changes in platelet count on a continuous scale and 1-year mortality and bleeding stratified according to STEMI.

**Supplementary Figure 19.** Spline functions of relative changes in platelet count on a continuous scale and 1-year mortality stratified according to any/in-hospital/out-of-hospital bleeding.

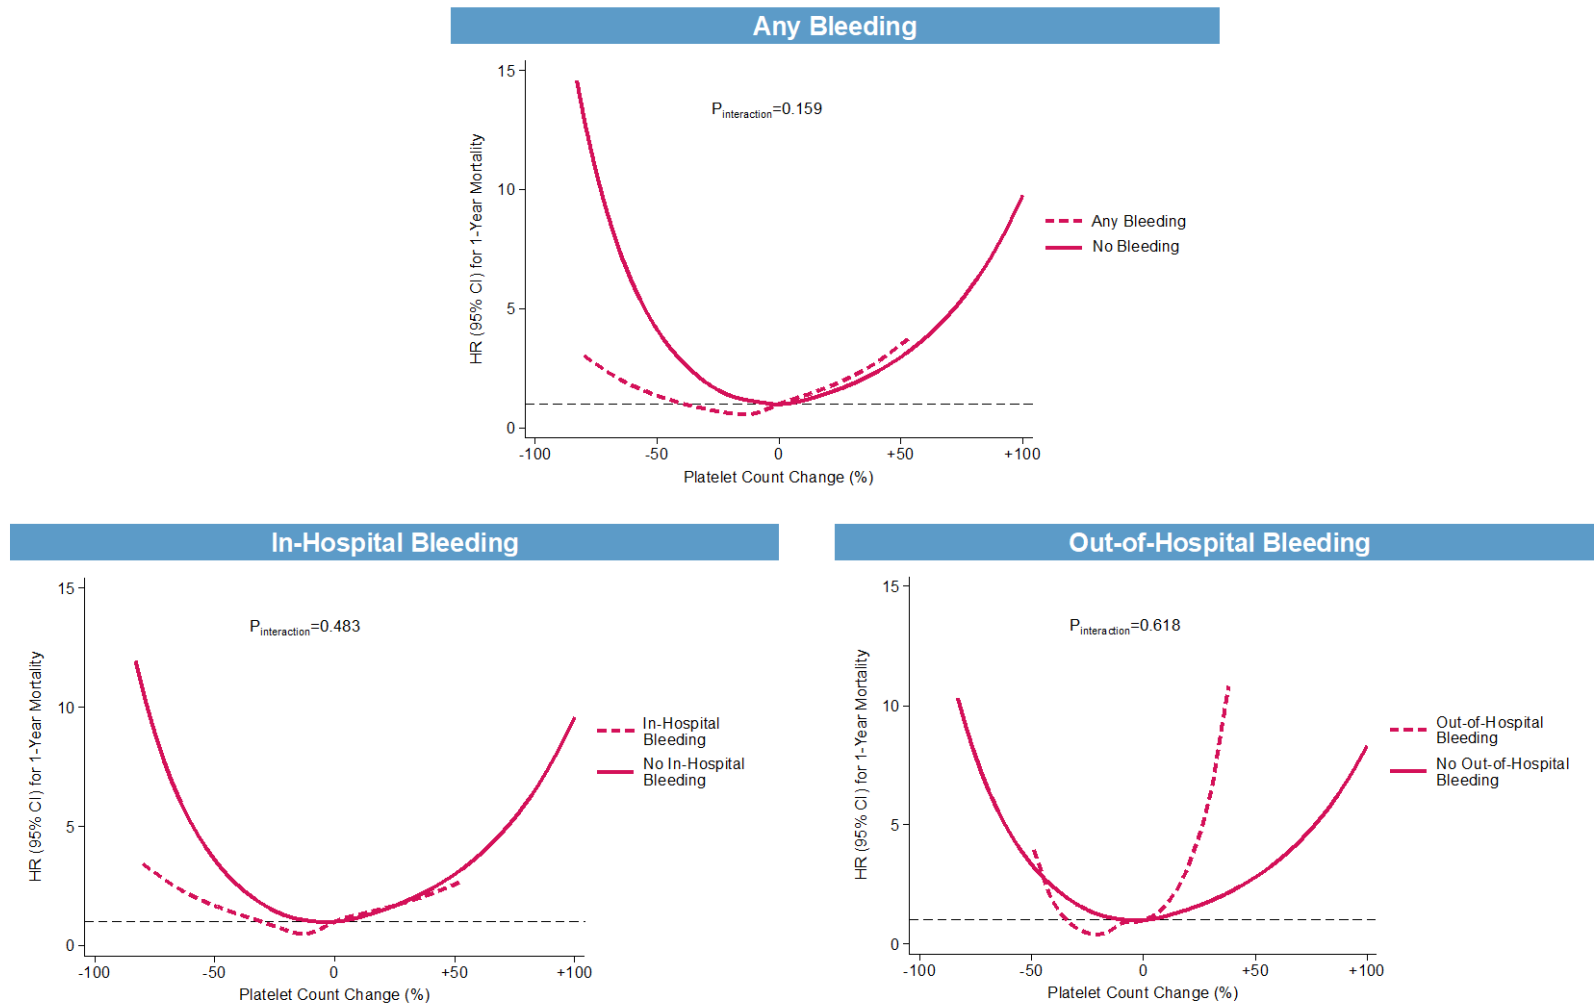

**Supplementary Figure 20.** Spline functions of relative changes in platelet count on a continuous scale and 1-year cardiovascular and noncardiovascular mortality.

(A) Cardiovascular mortality. (B) Noncardiovascular mortality.

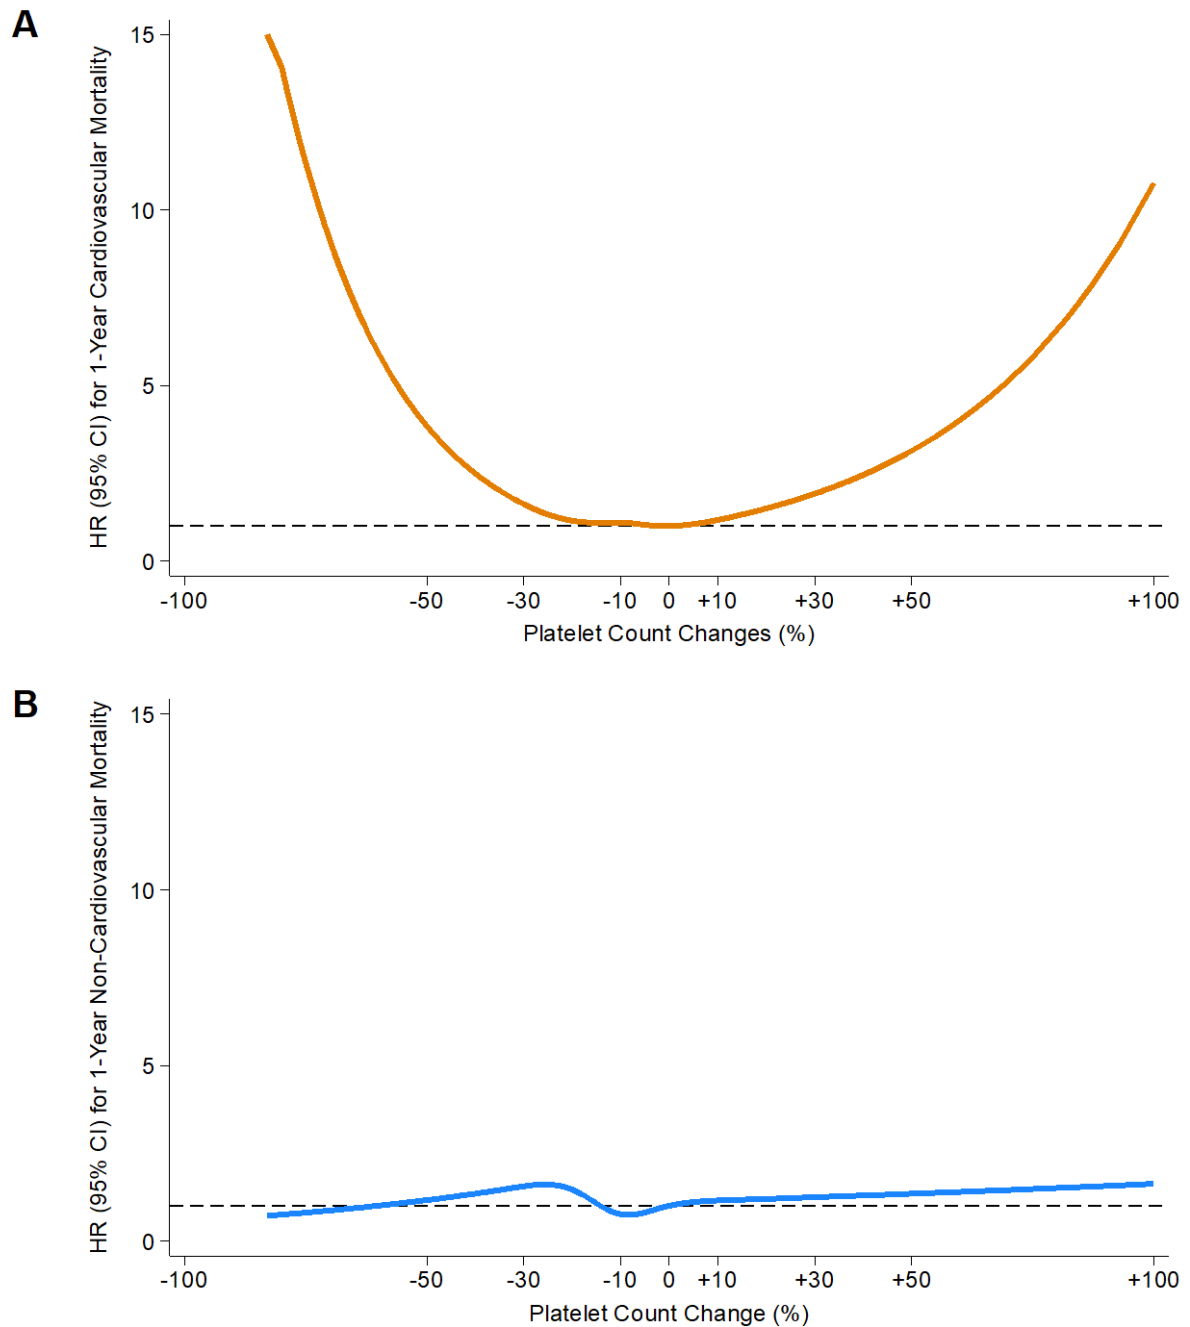

**Supplementary Figure 21.** Event rates of patients stratified according to platelet count drop/increase >30% and low (<100.000/ $\mu$ L)/high (> 450 000/ $\mu$ L) platelet count at baseline or nadir.

(A) Thrombocytopenia at baseline. (B) Thrombocytopenia at nadir. (C) Thrombocytosis at baseline. (D) Thrombocytosis at nadir.

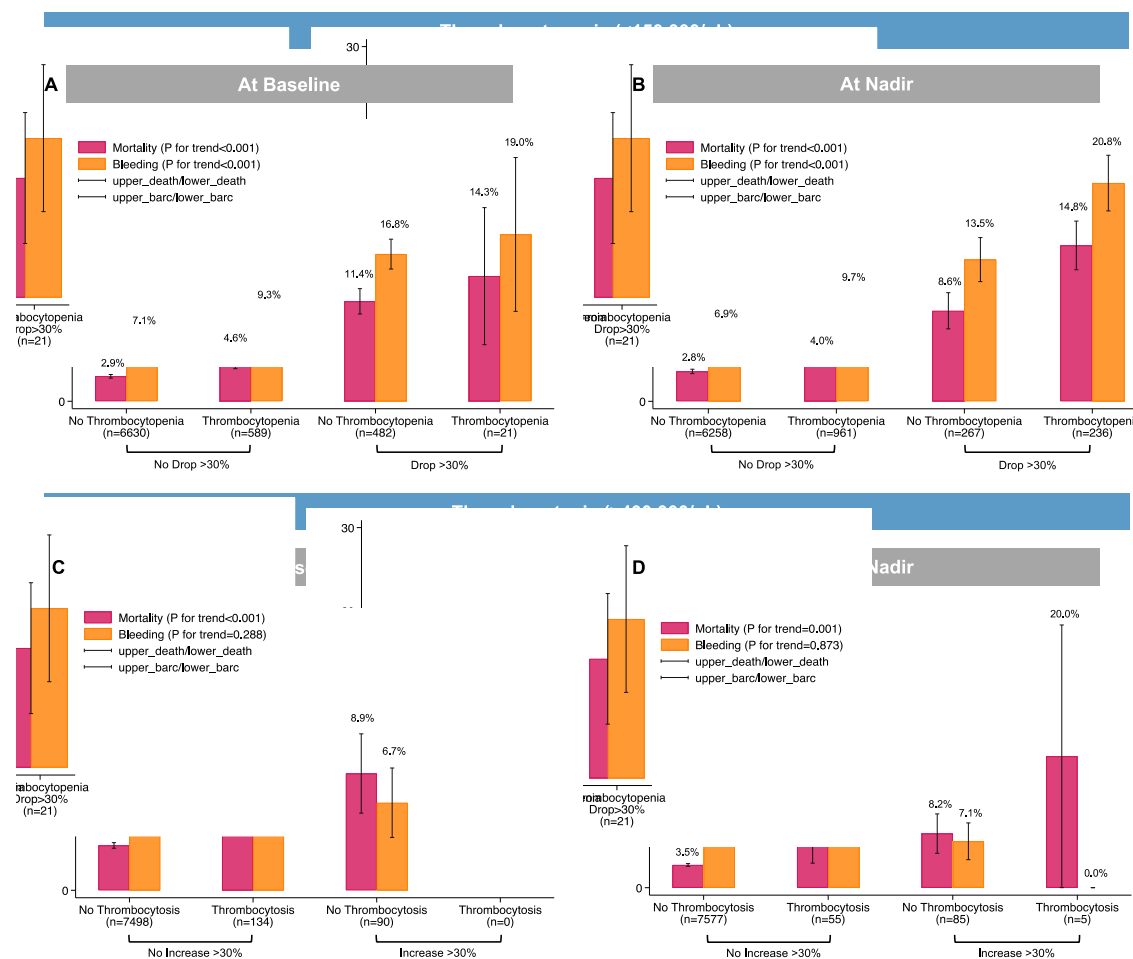



**Supplementary Figure 22.** Spline functions of absolute change in platelet count on a continuous scale and 1-year mortality and bleeding.

(A) Mortality. (B) Bleeding.

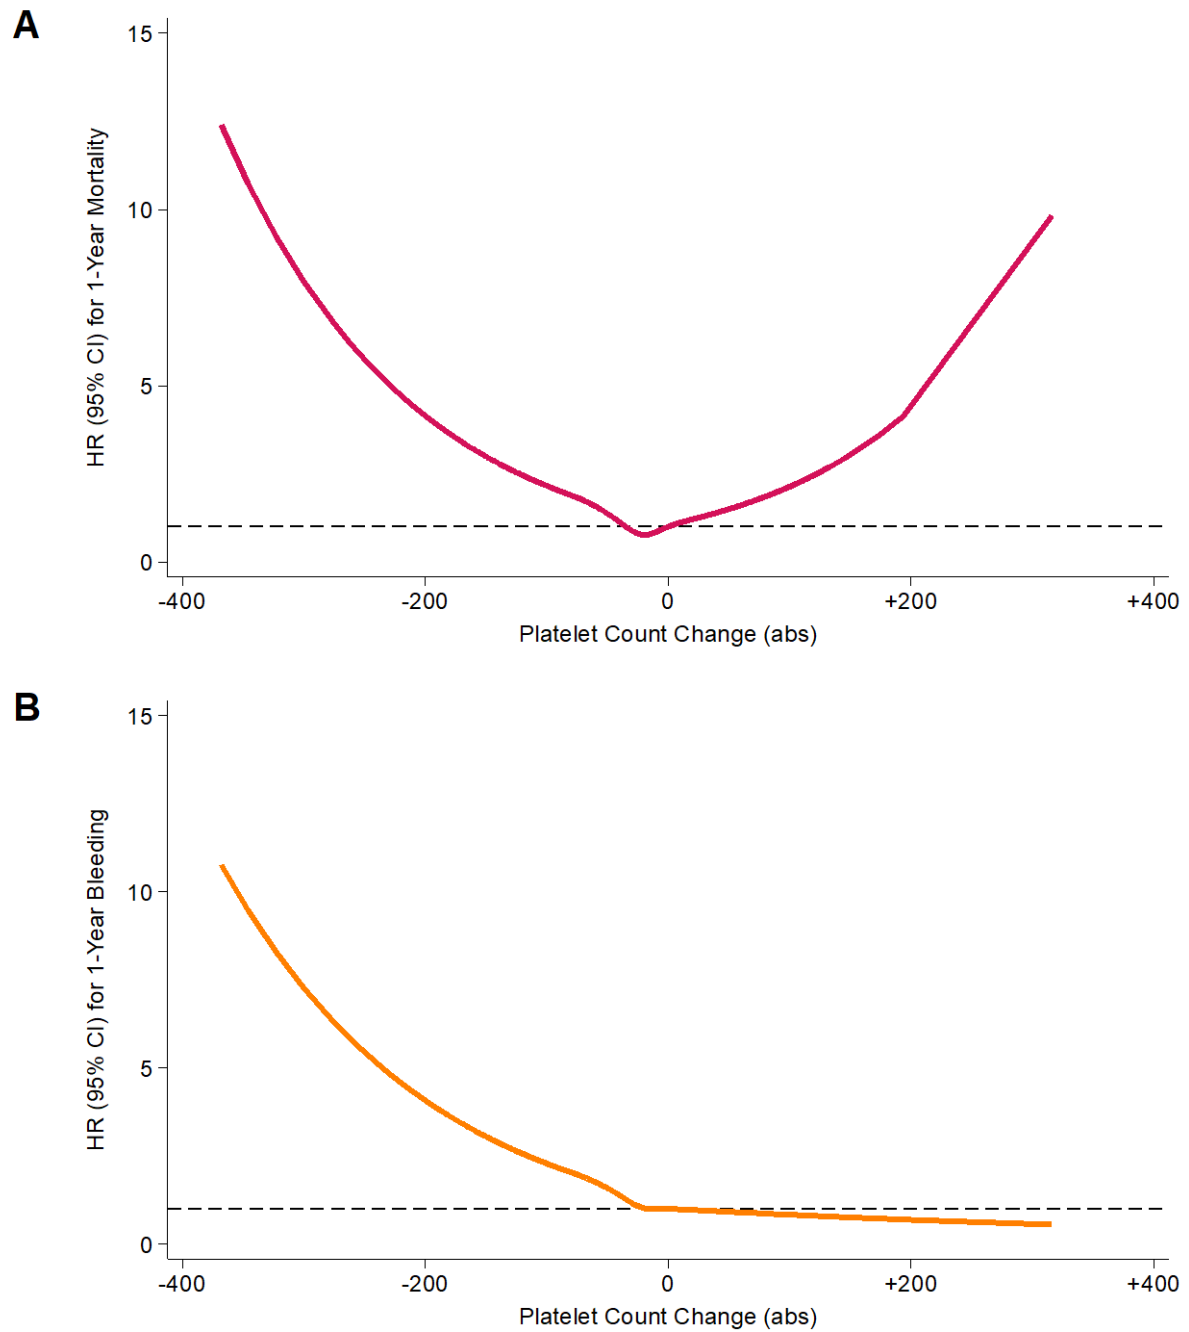

**Supplementary Figure 23.** Spline functions of relative changes in platelet count and 1-year mortality and bleeding after excluding patients with low ( $< 100\,000/\mu\text{L}$ ) or high ( $> 450\,000/\mu\text{L}$ ) platelet counts at baseline and/or nadir.

N = 7539 patients. (A) Mortality. (B) Bleeding.

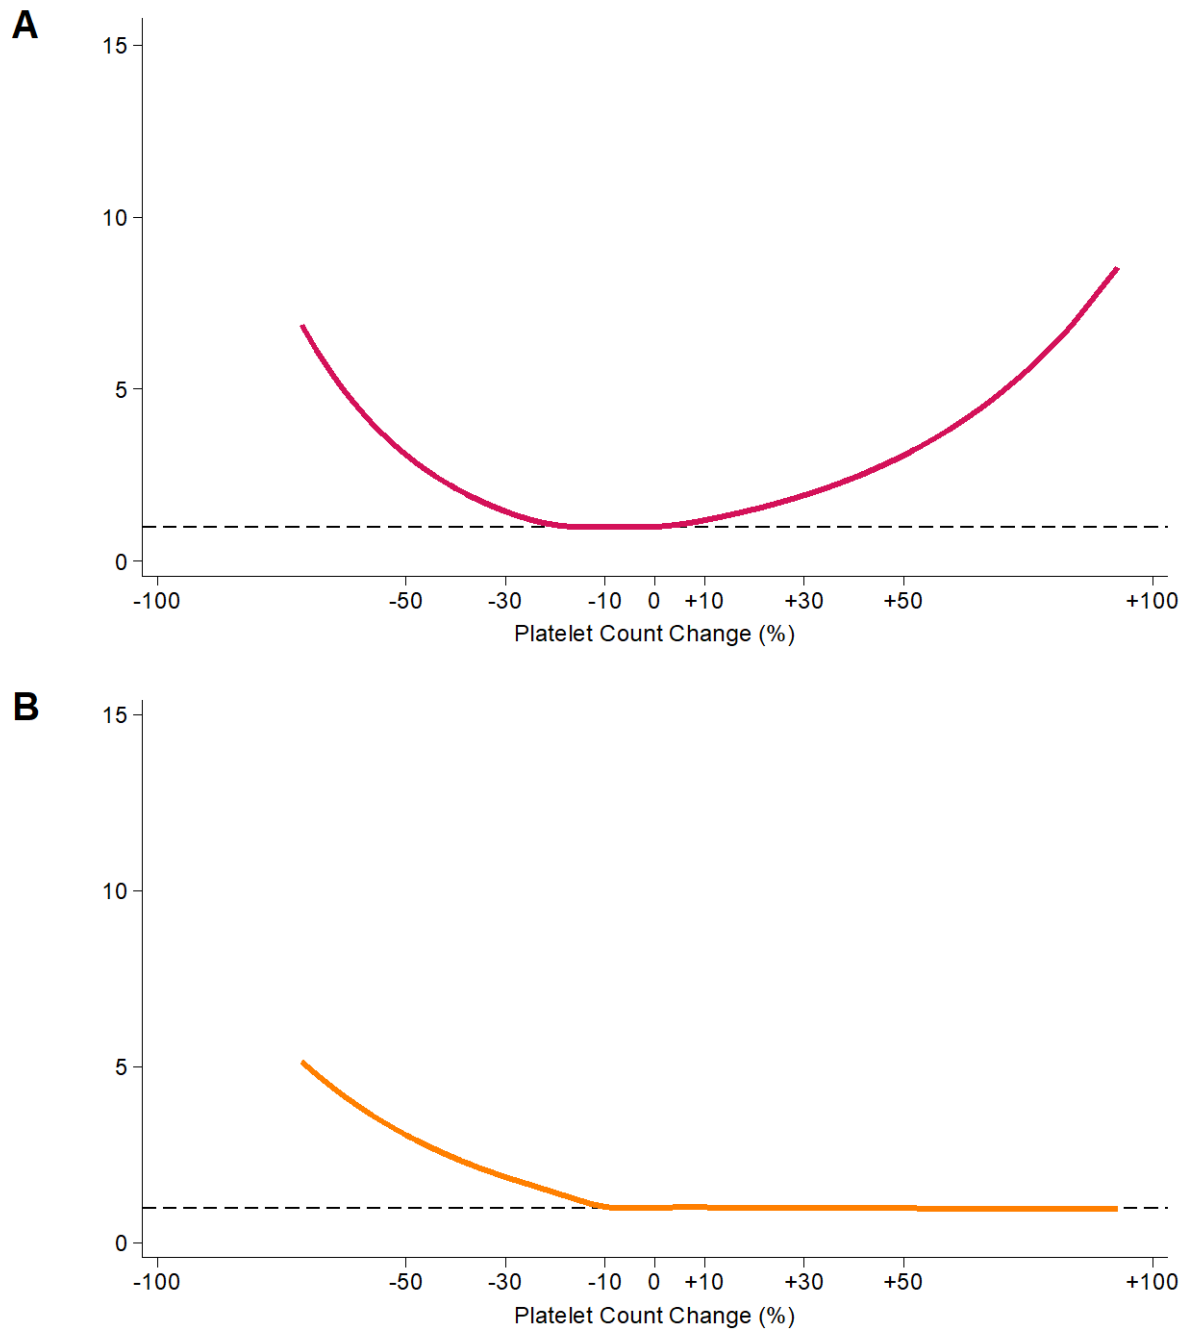

**Supplementary Figure 24.** Spline functions of absolute changes in platelet count and 1-year mortality and bleeding after excluding patients with low ( $<100\,000/\mu\text{L}$ ) or high ( $>450\,000/\mu\text{L}$ ) platelet counts at baseline and/or nadir.

N = 7539 patients. (A) Mortality. (B) Bleeding.

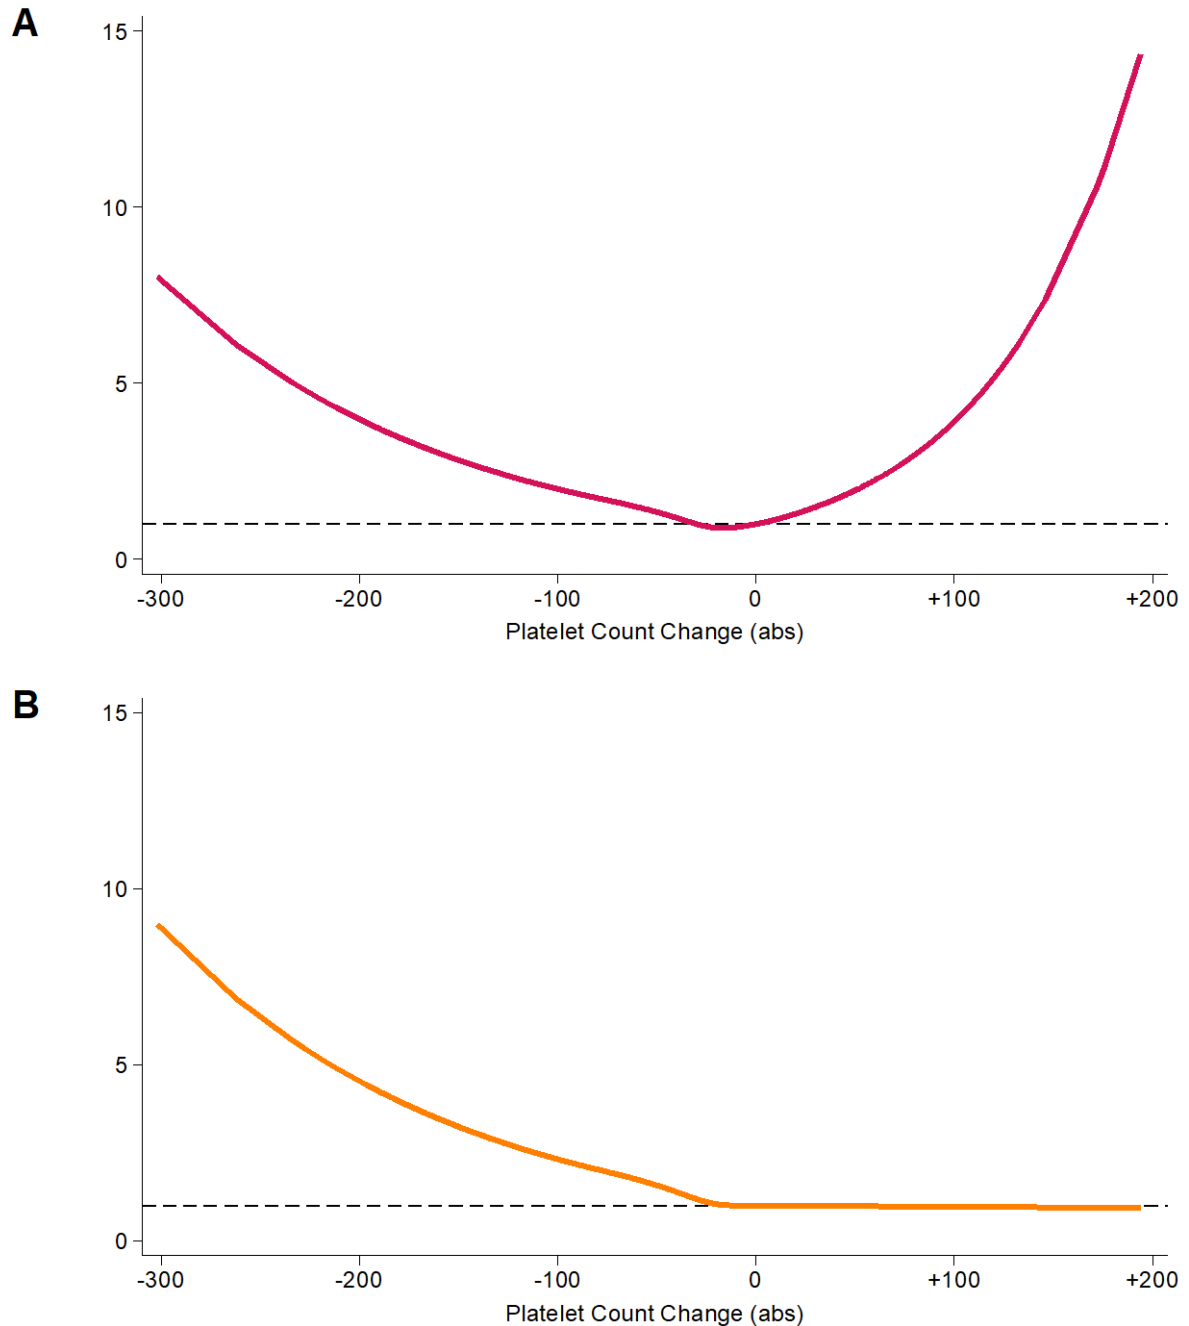

**Supplementary Figure 25.** Spline functions of relative changes in platelet count and 1-year mortality and bleeding after excluding patients receiving glycoprotein IIb/IIIa inhibitors.

N = 6686 patients. (A) Mortality. (B) Bleeding.

**Supplementary Figure 26.** Spline functions of absolute changes in platelet count and 1-year mortality and bleeding after excluding patients receiving glycoprotein IIb/IIIa inhibitors.

N = 6686 patients. (A) Mortality. (B) Bleeding.
